# Supplementary material for: Patient-reported outcomes at hospital discharge from Heart Centres, a national cross-sectional survey with a register-based follow-up: the DenHeart study protocol
Source: PubMed Central journal article supplement — BMJ Open. 2014 Apr 30;4(5):e004709. doi: 10.1136/bmjopen-2013-004709 (PMC4025470; doi:10.1136/bmjopen-2013-004709), 2014-04-30
Supplement: bmjopen-2013-004709.draft_revisions.pdf [file bmjopen-2013-004709.draft_revisions.pdf]

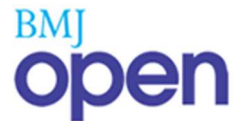

**Patient reported outcomes at hospital discharge from Heart Centres, a national cross-sectional survey with register based follow-up: The DenHeart study protocol.**

|                                 |                                                                                                                                                                                                                                                                                                                                                                                                                                                                                                                                                                                                                                                                                                                                                                                      |
|---------------------------------|--------------------------------------------------------------------------------------------------------------------------------------------------------------------------------------------------------------------------------------------------------------------------------------------------------------------------------------------------------------------------------------------------------------------------------------------------------------------------------------------------------------------------------------------------------------------------------------------------------------------------------------------------------------------------------------------------------------------------------------------------------------------------------------|
| Journal:                        | <i>BMJ Open</i>                                                                                                                                                                                                                                                                                                                                                                                                                                                                                                                                                                                                                                                                                                                                                                      |
| Manuscript ID:                  | bmjopen-2013-004709                                                                                                                                                                                                                                                                                                                                                                                                                                                                                                                                                                                                                                                                                                                                                                  |
| Article Type:                   | Protocol                                                                                                                                                                                                                                                                                                                                                                                                                                                                                                                                                                                                                                                                                                                                                                             |
| Date Submitted by the Author:   | 18-Dec-2013                                                                                                                                                                                                                                                                                                                                                                                                                                                                                                                                                                                                                                                                                                                                                                          |
| Complete List of Authors:       | Berg, Selina; Rigshospitalet, Heart Centre<br>Svanholm, Jette; Aarhus University Hospital, Department of Cardiology<br>Lauberg, Astrid; Aalborg University Hospital, Department of Cardiology and Department of Cardiothoracic Surgery<br>Borregaard, Britt; Odense University Hospital, Department of Thoracic, Cardiac and Vascular Surgery<br>Herning, Margrethe; Gentofte Hospital, Department of Cardiology<br>Mygind, Anna; Aarhus University Hospital, Department of Cardiology<br>Christensen, Anne; Rigshospitalet, Heart Centre<br>Christensen, Anne; National Institute of Public Health,<br>Ekholm, Ola; National Institute of Public Health,<br>Juel, Knud; National Institute of Public Health,<br>Thrysoe, Lars; Odense University Hospital, Department of Cardiology |
| <b>Primary Subject Heading</b>: | Cardiovascular medicine                                                                                                                                                                                                                                                                                                                                                                                                                                                                                                                                                                                                                                                                                                                                                              |
| Secondary Subject Heading:      | Cardiovascular medicine                                                                                                                                                                                                                                                                                                                                                                                                                                                                                                                                                                                                                                                                                                                                                              |
| Keywords:                       | CARDIOLOGY, Valvular heart disease < CARDIOLOGY, Ischaemic heart disease < CARDIOLOGY, Heart failure < CARDIOLOGY                                                                                                                                                                                                                                                                                                                                                                                                                                                                                                                                                                                                                                                                    |
|                                 |                                                                                                                                                                                                                                                                                                                                                                                                                                                                                                                                                                                                                                                                                                                                                                                      |

**Patient reported outcomes at hospital discharge from Heart Centres, a national cross-sectional survey with register based follow-up: The DenHeart study protocol.**

Selina Kikkenborg Berg, RN, MScN, Ph.D.<sup>1,2</sup>

Jette Svanholm, RN, MSc, Ph.D.<sup>3</sup>

Astrid Lauberg, RN, MScN<sup>4</sup>

Britt Borregaard, RN, MPQM<sup>5</sup>

Margrethe Herning, RN, MED<sup>2</sup>

Anna Mygind, MSPH, Ph.D.<sup>3</sup>

Anne Vinggaard Christensen, MSPH<sup>1</sup>

Anne Illemann Christensen, MSPH<sup>6</sup>

Ola Ekholm, MSc<sup>6</sup>

Knud Juel, Ph.D.<sup>6</sup>

Lars Thrysoe, RN, MLP, Ph.D.<sup>7</sup>

1. The Heart Centre, Unit 2151, Rigshospitalet, Copenhagen University Hospital Blegdamsvej 9, 2100 Copenhagen, Denmark
2. Department of Cardiology, Gentofte University Hospital, Niels Andersens Vej 65, 2900 Hellerup, Denmark
3. Department of Cardiology, Aarhus University Hospital, Brendstrupgaardsvej 100, 8200 Aarhus N, Denmark
4. Department of Cardiology and Department of Cardiothoracic Surgery, Aalborg University Hospital, Hobrovej 18-22, 9000 Aalborg, Denmark
5. Department of Thoracic, Cardiac and Vascular Surgery, Odense University Hospital, Sdr. Boulevard 29, 5000 Odense C, Denmark
6. National Institute of Public Health, University of Southern Denmark, Øster Farimagsgade 5A, 1353 Copenhagen, Denmark
7. Department of Cardiology, Odense University Hospital, University of Southern Denmark, Sdr. Boulevard 29, 5000 Odense C, Denmark

**Corresponding author:**

Selina Kikkenborg Berg, PhD.  
Copenhagen University Hospital, Rigshospitalet  
The Heart Centre, unit 2152  
Blegdamsvej 9  
2100 Copenhagen  
Denmark  
E-mail: [selina@rh.dk](mailto:selina@rh.dk)  
Tel: +45 3545 9526

## Abstract

Introduction: Patient reported health status, including symptom burden, functional status and quality of life, is an important measure of health. Differences in health status between diagnostic groups within cardiology have only been sparsely investigated. These outcomes may predict morbidity, mortality, labour market affiliation and health care utilization in various diagnostic groups. A national survey aiming to include all cardiac diagnostic groups from a total Heart Centre population has been designed as the DenHeart survey.

Methods and analysis: DenHeart is designed as a cross-sectional survey with register based follow-up. All diagnostic groups at the five national Heart Centres are included during one year (April 15<sup>th</sup> 2013 to April 15<sup>th</sup> 2014) and asked to fill out a questionnaire at hospital discharge. The total eligible population, both responders and non-responders, will be followed in national registers. The following instruments are used: SF-12, HADS, EQ-5D, B-IPQ, HeartQoL and ESAS. The following variables are collected from national registers: action diagnosis, procedures, co-morbidity, length of hospital stay, type of hospitalisation, visits to GP and other agents in primary health care, dispensed prescription medication, vital status, and cause of death. Labour market affiliation, sick leave, early retirement pension, educational degree and income will be collected from registers. Frequency distributions and multiple logistic regression analyses will be used to describe and assess differences in patient reported outcomes at hospital discharge between diagnostic groups and in-hospital predicting factors. Cox proportional hazards regression models with age as the time scale will be used to investigate associations between patient reported outcomes at baseline and morbidity/mortality, labour market affiliation and health care utilization after one year.

1  
2  
3  
4 Ethics and dissemination: The study complies with the Declaration of Helsinki. The study  
5  
6 has been approved by the Danish Data Protection Agency: 2007-58-0015/30-0937. Study  
7  
8 findings will be disseminated widely through peer reviewed publications and conference  
9  
10 presentations.  
11

12  
13  
14 Trial registration: ClinicalTrials.gov: NCT01926145.  
15  
16  
17  
18  
19  
20  
21  
22  
23  
24  
25  
26  
27  
28  
29  
30  
31  
32  
33  
34  
35  
36  
37  
38  
39  
40  
41  
42  
43  
44  
45  
46  
47  
48  
49  
50  
51  
52  
53  
54  
55  
56  
57  
58  
59  
60

## Introduction

Patient reported health status, which includes symptom burden, functional status and quality of life, is an important measure of health. Validated patient health status surveys, including disease specific instruments for patients with cardiovascular disease, allow quantification of critical patient-centred outcomes and additional research is needed to better understand the determinants<sup>1</sup> and the predicting factors of patients' health status. Previous studies suggest an association between heart disease, self-reported health and morbidity and mortality, and that patient reported outcome measures can predict prolonged hospital stay, future quality of life, return to work, morbidity and mortality in cardiac patients.<sup>2-7</sup> Quality of life scores seem to provide important prognostic information independent of traditional clinical data, as higher scores have been associated with longer survival in patients with ventricular arrhythmias and coronary artery disease.<sup>8,9</sup> However no studies have included all diagnostic groups within cardiology and comparisons among diagnostic groups are lacking. The overall aim of the DenHeart survey is to gain knowledge about patient reported outcome measures regarding health among cardiac patients at hospital discharge. Knowledge about patients' own perception of their health status and predicting factors can help to guide inpatient practice and outpatient follow-up. Furthermore, a survey combined with register data can be used to evaluate differences among diagnostic groups and predicting factors for patient reported outcome measures at hospital discharge and long-term morbidity and mortality. Also, economic analysis of healthcare utilisation and work ability status in a large cohort of cardiac patients is needed. Therefore, the DenHeart study is designed as a national survey aiming to include all cardiac diagnostic groups from a total Heart Centre population.

### *Objectives*

The objectives of the DenHeart study are to describe: (i) differences in patient reported outcomes at hospital discharge between diagnostic groups and in-hospital predicting factors and (ii) patient reported outcomes at hospital discharge as a predictor of a) morbidity and mortality, b) labour market affiliation and c) health care utilization after one year.

### **Methods and analysis**

#### *Study design*

The DenHeart study is designed as a cross-sectional survey with register based follow-up. All cardiac patients are asked to fill out a questionnaire at hospital discharge to evaluate patient reported outcomes. Furthermore, the total eligible population, both responders and non-responders, will be followed in national registers.

#### *Setting and participants*

The five Heart Centres in Denmark are including patients during a one year period, from April 15<sup>th</sup> 2013 to April 15<sup>th</sup> 2014. One centre began data collection later, May 1<sup>st</sup> 2013. Four heart centres have both medical and surgical wards, one centre medical wards only. All cardiac patients discharged or transferred to a local hospital from one of the Heart Centres are potential participants in the study. Patients are unselected and consecutively included at hospital discharge. Included patients are asked to complete and return a questionnaire before they leave the hospital or alternatively to do so at home within 3 days of discharge and return it by mail. Patients who are transferred to another hospital are given the questionnaire at discharge from the Heart Centre and asked to fill it out at the

1  
2  
3  
4 day of hospital discharge or alternatively to do so at home within 3 days of discharge and  
5  
6 then return it by mail.  
7

### 8 9 *Eligibility criteria*

10 All diagnostic groups within cardiology are included. Patients with ischemic heart disease  
11 (e.g. coronary angiography, percutaneous coronary intervention), heart failure (e.g.  
12 coronary artery bypass graft, heart transplantation), arrhythmia (e.g. ablation, labyrinth,  
13 pacemaker, implantable cardioverter defibrillator), heart valve disease (e.g. stent, valve  
14 replacement), endocarditis and congenital heart disease (e.g. atrium septum defect, patent  
15 ductus arteriosus, patent foramen ovale, coarctatio) are diagnosed and treated at the  
16 Heart Centres. Infrequent conditions such as thorax-trauma are also included.  
17  
18  
19  
20  
21  
22  
23  
24  
25  
26

27  
28 Patients under 18 years of age and patients without a Danish civil registration number are  
29 excluded from the study. For ethical reasons, patients who are unconscious when  
30 transferred are also excluded.  
31  
32  
33  
34

35 Reasons for non-response are recorded which allows for sub-analyses of these groups.

36  
37 On the front page of the questionnaire there is a box that enables the patient or nurse to  
38 tick off the reason for non-response: "Does not wish to participate", "Not able to participate  
39 because of illness", "Not able to participate because of language barrier", "Questionnaire  
40 not handed out" and "Other".  
41  
42  
43  
44  
45  
46

### 47 *Recruitment*

48  
49 Patients are recruited at hospital discharge (the same day or the day before discharge) by  
50 the ward nurse in charge of the discharge of the individual patients or by a research nurse.  
51  
52 All nurses at the centres, approximately 800, have been informed about the study and  
53 procedures at ward meetings, guidelines have been distributed and a website created  
54  
55  
56  
57  
58  
59  
60

1  
2  
3  
4 (www.DenHeart.dk). When informing patients about the study and handing out the  
5  
6 questionnaire, nurses also distribute a postage pre-paid envelope to them to return the  
7  
8 questionnaire in, either at the ward or after discharge. No reminders are sent to patients as  
9  
10 the time window of three days post discharge makes it impossible. Distribution and return  
11  
12 rates are monitored to allow for interventions if the rates drop during data collection.  
13

#### 14 15 16 *Data sources/measurement*

17  
18 The following patient reported outcome measures are used: Short-form 12 (SF-12),  
19  
20 Hospital Anxiety and Depression Scale (HADS), EQ-5D, Brief Illness Perception  
21  
22 Questionnaire (B-IPQ), HeartQoL and Edmonton Symptom Assessment Scale (ESAS).  
23

24  
25 SF-12: The SF-12 is a 12-item version of the SF-36 and is a brief, reliable measure of  
26  
27 overall health. The questionnaire measures eight domains of health: physical function,  
28  
29 role-physical, bodily pain, general health, vitality, social functioning, role-emotional and  
30  
31 mental health with higher scores indicating better health status. The items cover the  
32  
33 previous four weeks and results are expressed in terms of two summary scores: the  
34  
35 Physical Component Summary (PCS) and the Mental Component Summary (MCS).<sup>10</sup> A  
36  
37 Cronbach's alpha of 0.87 and 0.84 for PCS-12 and MCS-12 respectively have been  
38  
39 reported in a population of coronary heart disease patients.<sup>11</sup> The SF-12 is a suitable for  
40  
41 studies focusing on patient-based assessment of physical and mental health.<sup>10</sup>  
42  
43

44  
45 Furthermore it is used in the National Health Surveys and outcomes can be compared.  
46  
47

48  
49 HADS: HADS is a 14-item questionnaire that assesses levels of depression and anxiety in  
50  
51 medically ill patients. The scale offers two scores, HADS-A and HADS-D, and consists of  
52  
53 seven questions to assess anxiety and seven questions to assess depression.<sup>12</sup> For each  
54  
55 of the questions the respondent chooses from four responses to indicate the extent to  
56  
57  
58  
59  
60



1  
2  
3  
4 which each applies for the last week. HADS is a valid and internally consistent measure,  
5  
6 with a mean Cronbach's alpha of 0.83 and 0.82 for the HADS-A and HADS-D  
7  
8 respectively.<sup>13</sup> Scores of 0 to 7 for either subscale are regarded as normal and scores of 8  
9  
10 to 10 suggest the presence of a mood disorder. Scores of 11 and above indicate the  
11  
12 probable presence of a mood disorder.<sup>14</sup>  
13

14  
15  
16 EQ-5D: The EQ-5D is a standardised instrument for measuring current health status that  
17  
18 provides a simple descriptive profile and a single index value that can be used in clinical  
19  
20 and economic evaluation of health care and in population health surveys. The  
21  
22 questionnaire covers five dimensions of health: mobility, self-care, usual activities,  
23  
24 pain/discomfort and anxiety/depression. Each dimension is divided into three levels: no  
25  
26 problems, some or moderate problems or extreme problems. The questionnaire consists  
27  
28 of a descriptive system produced in a standard layout that enables the respondent to  
29  
30 classify his/her health according to the five dimensions and a Visual Analogue Scale that  
31  
32 enables the respondent to provide a self-rating of his/her own health. Higher scores  
33  
34 indicate better health status.<sup>15</sup> An overall Cronbach's alpha of 0.73 has been found in a  
35  
36 population of coronary heart disease patients.<sup>11</sup>  
37  
38  
39

40  
41 B-IPQ: B-IPQ is a short questionnaire that assesses cognitive and emotional  
42  
43 representations of illness on the basis of eight items. The eight items each represent a  
44  
45 dimension of the respondent's perception of his or her own illness. Five items assess  
46  
47 current cognitive representations of illness: consequences, timeline, personal control,  
48  
49 treatment control and identity. Two items assess emotional representations of illness:  
50  
51 concern and emotions. The last item assesses illness comprehensibility. A higher score on  
52  
53 the B-IPQ reflects a more threatening view of illness. B-IPQ has good test-retest reliability  
54  
55  
56  
57  
58  
59  
60

1  
2  
3  
4 measured with Pearson correlations and has shown good predictive validity among  
5  
6 patients recovering from myocardial infarction.<sup>16</sup>  
7

8  
9 HeartQoL: HeartQoL is an illness specific questionnaire that measures quality of life (QoL)  
10  
11 in cardiac patients. The questionnaire covers the previous four weeks and produces a  
12  
13 global score and two subscales. A physical and an emotional scale with higher scores  
14  
15 indicating better QoL status. HeartQoL is a new questionnaire developed on the basis of  
16  
17 items from three widely used questionnaires for specific groups of cardiac patients (Seattle  
18  
19 Angina Questionnaire, MacNew Heart Disease Health-related Quality of Life Questionnaire  
20  
21 and Minnesota Living with Heart Failure questionnaire). The questionnaire has proven to  
22  
23 be a reliable instrument with a Cronbach's alpha between 0.80-0.91 for the global score  
24  
25 and each subscale and to be responsive in patients with a wide spectrum of diagnoses.<sup>17-19</sup>  
26  
27  
28  
29

30 ESAS: ESAS is a 10 item questionnaire that allows patients to rate their current symptoms  
31  
32 on a visual numeric scale. The following symptoms are included: pain, tiredness, nausea,  
33  
34 depression, anxiety, drowsiness, appetite, well-being, shortness of breath and distress.  
35  
36 Higher scores indicate the presence and intensity of the symptoms. ESAS has proven to  
37  
38 be a valid instrument to measure cancer patients' self-reported symptoms with an overall  
39  
40 Cronbach's alpha of 0.79.<sup>20</sup> However, the scale has not yet been evaluated in cardiac  
41  
42 patients.  
43  
44  
45

46 Besides the validated questionnaires, thirteen questions about health behaviour, sense of  
47  
48 security and use of medicines are included in the questionnaire. This amounts to a total of  
49  
50 62 items. The questionnaire was pre-tested for feasibility by 12 (10 male, 2 female)  
51  
52 patients aged 52-81 years old (mean 65.9) on medical and surgical wards at three of the  
53  
54  
55  
56  
57  
58  
59  
60

1  
2  
3  
4 Heart Centres, and the introduction and layout was adjusted afterwards. The questionnaire  
5  
6 takes about 20 minutes to complete.  
7

### 8 9 *Variables from registers*

10  
11 Because all Danish citizens have a unique personal identification number, linkage between  
12  
13 the national registers and other data sources is feasible. Therefore, the Danish registers  
14  
15 offer a great number of possibilities for national epidemiological studies.<sup>21</sup>  
16

17  
18 For the DenHeart study, data are drawn at baseline and follow-up after one year from the  
19  
20 following registers:  
21

22  
23  
24 The Danish Civil Registration System:<sup>22</sup> Gender, age, marital status.  
25

26  
27 The Danish National Patient Register:<sup>23</sup> Action diagnosis, other diagnoses, procedures,  
28  
29 length of hospital stay, type of hospitalisation (acute, heart related, other).  
30

31  
32 The Danish National Health Service Register:<sup>24</sup> Contact with general practitioners and  
33  
34 other agents in primary health care.  
35

36  
37 Registers on personal labour market affiliation:<sup>25</sup> Labour market affiliation, sick leave, early  
38  
39 retirement pension.  
40

41  
42  
43 Population Education Register:<sup>26</sup> Educational degree.  
44

45  
46 The Income Statistics Register:<sup>27</sup> Income.  
47

### 48 49 *Data handling and record keeping*

50  
51 Questionnaires are mailed from the Heart Centres or from the patients' home to a  
52  
53 scanning agency (Express A/S). Questionnaires are scanned and the file delivered to The  
54  
55 National Institute of Public Health, University of Southern Denmark and placed on a secure  
56  
57  
58  
59  
60

1  
2  
3  
4 hard drive. When the data collection is finished, the entire dataset will be reviewed in order  
5  
6 to remove ineligible respondents, e.g. pulmonary trauma. Furthermore, the entire  
7  
8 population of patients discharged from the Heart Centres during the data collection period  
9  
10 will be drawn from the National Patient Register. This will be reviewed in order to remove  
11  
12 irrelevant discharges, in accordance with the inclusion criteria.  
13

### 14 15 16 *Data monitoring*

17  
18 In order to monitor trial conduct, reports are continuously delivered from the scanning  
19  
20 agency in order to identify the need for adjustments. A data file is delivered every two  
21  
22 weeks during the first three months and every month thereafter throughout the entire data  
23  
24 collection period. The data file includes a list of received questionnaires ranked by centre  
25  
26 and unit, and information on whether the questionnaire has been completed on the front  
27  
28 page. The numbers are compared to the number of patients discharged at unit level in the  
29  
30 same period. Assessments of response rates are done and adjustments made if needed.  
31  
32 Low response rates in a unit will lead to contact with the unit concerned to learn the reason  
33  
34 why and actions to increase them. Returned questionnaires will be screened for  
35  
36 systematic errors.  
37  
38  
39

### 40 41 *Study size*

42  
43 The study size is not derived statistically, as it consists of the total population of patients  
44  
45 discharged from the five Heart Centres in the project period. The five Heart Centres  
46  
47 diagnose and treat about 45,000 patients per year. These patients are diagnosed with  
48  
49 numerous diseases and conditions and the aim is to describe differences, not only among  
50  
51 the most common diagnoses but also the infrequent ones. Thus, all patients discharged  
52  
53 from national Heart Centres over one year are included in order to secure as high a level  
54  
55 of specificity as possible. Furthermore, by including a large number of participants, a  
56  
57  
58  
59  
60

1  
2  
3  
4 shorter follow-up time is needed. Besides the primary objectives, further ancillary and spin-  
5  
6 off analyses will be prepared. Clearly, power calculations cannot be performed  
7  
8 prospectively for all potential analyses based on data from the DenHeart study. Moreover,  
9  
10 adverse outcomes have very different incident rates.

### 13 *Response rate*

14  
15 The final response rate is calculated based on discharge data from the National Patient  
16  
17 Register. For calculating the actual number of eligible patients, the following are not  
18  
19 included: patients without a Danish civil registration number, patients living in Greenland  
20  
21 (no register follow-up possible), patients with two admissions within 24 hours, patients  
22  
23 deceased in hospital and outpatient visits. Patients admitted for less than 24 hours without  
24  
25 a procedure and readmitted with a procedure within one month are counted once.  
26  
27

28  
29 Patients who have filled out more than one questionnaire during the project period due to  
30  
31 repeated hospitalizations will only be counted once (the first questionnaire returned) in the  
32  
33 final count of the response rate. The repeated measurements may be included in sub-  
34  
35 analyses.  
36  
37

### 38 *Statistical methods*

39  
40 Objective 1: For each diagnostic group, age (mean), sex distribution and patient reported  
41  
42 outcomes at hospital discharge distribution will be reported. Differences between groups  
43  
44 will be tested by use of ANOVA tests for continuous variables and chi-squared tests for  
45  
46 categorical variables. Multivariate logistic regression will be used to investigate the  
47  
48 relationship between diagnostic group and patient reported outcomes when controlling for  
49  
50 response date (number of days since hospital discharge), age, sex and other possible  
51  
52  
53  
54  
55  
56  
57  
58  
59  
60

1  
2  
3  
4 confounders, and in-hospital predicting factors (e.g. procedure, duration of index hospital  
5 admission, acute/elective admission, stay at intensive care unit, complications).  
6  
7

8  
9 Objective 2a: For each diagnostic group, the crude associations between patient reported  
10 outcome measures at hospital discharge and all-cause and cardiac morbidity and all-  
11 cause and cardiac mortality after one year, will be described and assessed using ANOVA  
12 tests for continuous variables and chi-squared tests for categorical variables. In addition,  
13 multivariate Cox proportional hazards regression models, with age as the time scale, will  
14 be used to examine the associations between patient reported outcome measures at  
15 baseline and all-cause morbidity and mortality and cardiac morbidity and mortality when  
16 adjusting for response date, sex, co-morbidity and other potential confounding factors at  
17 baseline.  
18  
19  
20  
21  
22  
23  
24  
25  
26  
27  
28  
29

30 Objective 2b: For each diagnostic group, the crude associations between patient reported  
31 outcome measures at hospital discharge and labour market affiliation (employment status,  
32 sick leave, early retirement pension) after one year will be described and assessed using  
33 the ANOVA tests for continuous variables and chi-squared tests for categorical variables.  
34 Multivariate Cox proportional hazards regression models, with age as the time scale, will  
35 also be carried out to investigate the associations between patient reported outcome  
36 measures at baseline and labour market affiliation when adjusting for potential  
37 confounding factors (e.g. response date, sex, co-morbidity).  
38  
39  
40  
41  
42  
43  
44  
45  
46  
47

48 Objective 2c: For each diagnostic group, the crude associations between patient reported  
49 outcomes measures at hospital discharge and health care utilization (hospitalizations,  
50 contact with general practitioner, medical specialist, and physiotherapist) after one year,  
51 will be described and assessed using the ANOVA tests for continuous variables and chi-  
52  
53  
54  
55  
56  
57  
58  
59  
60

1  
2  
3  
4 squared tests for categorical variables. Multivariate Cox proportional hazards regression  
5  
6 models, with age as the time scale, will be used to analyse the association between  
7  
8 patient reported outcome measures at baseline and health care utilization when adjusting  
9  
10 for potential confounding variables (e.g. response date, sex, co-morbidity).  
11

### 12 13 *Weighting*

14  
15 It is possible to link both respondents and non-respondents in the survey on an individual  
16  
17 level to different administrative registers. Thus, non-response weights will be computed  
18  
19 based on register information (e.g. sex and age) in order to reduce non-response bias.  
20  
21

22 Patients with a low probability of response will be given a higher weight in the analyses to  
23  
24 represent the larger number of non-respondents with similar characteristics. Accordingly,  
25  
26 patients more likely to respond will be given a lower weight.  
27

### 28 29 *Spin-off projects*

30  
31 Several spin-off analyses will be prepared and conducted, e.g. a three year follow up  
32  
33 analysis on the primary outcomes, the association between patient reported outcomes at  
34  
35 discharge and cardiac events over time, patient reported outcomes and medication  
36  
37 compliance and patient reported outcomes as a screening tool in clinical practice. A follow-  
38  
39 up survey after two to five years is being considered.  
40  
41  
42  
43

### 44 45 **Ethics and dissemination**

46  
47 The study is conducted in accordance with the Declaration of Helsinki. According to  
48  
49 Danish legislation, surveys should not be approved by an ethics committee system but  
50  
51 only by the Danish Data Protection Agency, no. 2007-58-0015/30-0937. The DenHeart  
52  
53 survey is approved by the Institutional Boards of the Heart Centres and registered at  
54  
55 ClinicalTrials.gov (NCT01926145).  
56  
57  
58  
59  
60

1  
2  
3  
4 The National Institute of Public Health stores data from the DenHeart survey. Access to  
5  
6 data can only be provided to investigators after approval from the Publication Committee.  
7

8 All study results will be published in international research journals and conference  
9  
10 presentations.  
11

## 12 13 **Discussion**

### 14 15 *Study population*

16  
17 The five Heart Centres treat the most critically ill cardiac patients in Denmark.  
18

19  
20 Approximately 47 regional or local hospitals treat cardiac patients medically and care for  
21  
22 terminally ill cardiac patients. These patients are underrepresented in the DenHeart study.  
23

24  
25 The patients in this study represent the patients with diagnoses where medical, invasive or  
26  
27 surgical treatment is possible, and patients with rare conditions such as heart transplant  
28  
29 and congenital heart disease. Furthermore, four of the five Heart Centres have a local  
30  
31 hospital function treating all cardiac diagnoses. One surgical unit did not wish to participate  
32  
33 in the study.  
34  
35

36  
37 Patients who are hospitalised several times in the project period will be asked to fill out the  
38  
39 questionnaire each time. Repeated measures will only be used in sub-analyses. For  
40  
41 reporting of primary outcomes, patients will only be counted once (the first questionnaire  
42  
43 returned).  
44  
45

### 46 47 *Variables*

48  
49 The majority of the outcome measures included in the questionnaire is comprised of  
50  
51 validated and standardised instruments to assess patient reported outcomes, which  
52  
53 enhances the validity of the questionnaire. However, in the interpretation of the results, it  
54  
55  
56  
57  
58  
59  
60



1  
2  
3  
4 must be taken into account that patients with different cardiac conditions differ regarding  
5  
6 how much their health status has changed prior to admission to hospital, and that some of  
7  
8 the instruments have long recall.  
9

### 10 11 *Confounding factors*

12  
13  
14 From previous national health surveys, we know that age and socioeconomic position play  
15  
16 a significant role for non-response. Also, regional differences of about 15 % in response  
17  
18 rates have been documented.<sup>28, 29</sup> The patients treated at the Heart Centres are often aged  
19  
20 and severely ill, which may be reflected in the response rates. This will be accounted for  
21  
22 by reporting both actual responses as well as weighted data for the underrepresented  
23  
24 groups in the analyses. However, several different initiatives are being conducted by the  
25  
26 centres to optimize response rates. Nurses are reminded to hand out the questionnaires at  
27  
28 local meetings, by posters in the ward and logo-pens, and response rates are continuously  
29  
30 shared with the ward nurses in order to secure motivation among the approximately 800  
31  
32 nurses involved in the distribution of questionnaires. Letters are sent to the local hospitals  
33  
34 that receive patients from the Heart Centres asking to remind the patients to fill out the  
35  
36 questionnaire at discharge to home. Some centres are mailing questionnaires to patients  
37  
38 after discharge when they are not handed out in hospital. As this is a national multicentre  
39  
40 study, regional differences in ways to enhance the response rates may occur. All of these  
41  
42 different strategies fall within the frame of the DenHeart study and timeframe for  
43  
44 responding.  
45  
46  
47  
48  
49

### 50 51 **Contributorship**

52  
53  
54  
55  
56  
57  
58  
59  
60

1  
2  
3  
4 SKB conceived the study. SKB, AVC, MH, LT, BB, JS, AM, AL, AIC, KJ and OE initiated  
5  
6 the study design and implementation. KJ, AIC and OE provided statistical expertise in the  
7  
8 clinical trial design. All contributed to the refinement of the study protocol.  
9

### 10 11 **Funding**

12  
13  
14 This work was supported by the five participating Heart Centres in Denmark. Further  
15  
16 funding will be applied for from external funds.  
17  
18

### 19 20 **Competing interest**

21  
22 No competing interests have been declared by the authors.  
23  
24  
25  
26  
27  
28  
29  
30  
31  
32  
33  
34  
35  
36  
37  
38  
39  
40  
41  
42  
43  
44  
45  
46  
47  
48  
49  
50  
51  
52  
53  
54  
55  
56  
57  
58  
59  
60

## References

1. Rumsfeld JS, Alexander KP, Goff DC, Jr, *et al.* Cardiovascular health: the importance of measuring patient-reported health status: a scientific statement from the American Heart Association. *Circulation* 2013;127(22):2233-49.
2. Pressler SJ, Kim J, Riley P, *et al.* Memory dysfunction, psychomotor slowing, and decreased executive function predict mortality in patients with heart failure and low ejection fraction. *J Card Fail* 2010;16(9):750-60.
3. Hoekstra T, Jaarsma T, van Veldhuisen DJ, *et al.* Quality of life and survival in patients with heart failure. *Eur J Heart Fail* 2013;15(1):94-102.
4. Soto GE, Jones P, Weintraub WS, *et al.* Prognostic value of health status in patients with heart failure after acute myocardial infarction. *Circulation* 2004;110(5):546-51.
5. Heidenreich PA, Spertus JA, Jones PG, *et al.* Health status identifies heart failure outpatients at risk for hospitalization or death. *J Am Coll Cardiol* 2006;47(4):752-6.
6. Biering K, Nielsen TT, Rasmussen K, *et al.* Return to work after percutaneous coronary intervention: the predictive value of self-reported health compared to clinical measures. *PLoS One* 2012;7(11):e49268.
7. Szekely A, Nussmeier NA, Miao Y, *et al.* A multinational study of the influence of health-related quality of life on in-hospital outcome after coronary artery bypass graft surgery. *Am Heart J* 2011;161(6):1179-1185.

- 1  
2  
3  
4 8. Steinberg JS, Joshi S, Schron EB, *et al.* Psychosocial status predicts mortality in  
5  
6 patients with life-threatening ventricular arrhythmias. *Heart Rhythm* 2008;5(3):361-5.  
7  
8
- 9  
10 9. Spertus JA, Jones P, McDonell M, *et al.* Health status predicts long-term outcome in  
11  
12 outpatients with coronary disease. *Circulation* 2002;106(1):43-9.  
13  
14
- 15 10. Ware J, Jr, Kosinski M, Keller SD. A 12-Item Short-Form Health Survey: construction of  
16  
17 scales and preliminary tests of reliability and validity. *Med Care* 1996;34(3):220-33.  
18  
19
- 20 11. De Smedt D, Clays E, Doyle F, *et al.* Validity and reliability of three commonly used  
21  
22 quality of life measures in a large European population of coronary heart disease patients.  
23  
24 *Int J Cardiol* 2013;167(5):2294-9.  
25  
26
- 27 12. Zigmond AS, Snaith RP. The hospital anxiety and depression scale. *Acta Psychiatr*  
28  
29 *Scand* 1983;67(6):361-70.  
30  
31
- 32 13. Bjelland I, Dahl AA, Haug TT, *et al.* The validity of the Hospital Anxiety and Depression  
33  
34 Scale. An updated literature review. *J Psychosom Res* 2002;52(2):69-77.  
35  
36
- 37 14. Snaith RP. The Hospital Anxiety And Depression Scale. *Health Qual Life Outcomes*  
38  
39 2003;1:29.  
40  
41
- 42 15. Rabin R, de Charro F. EQ-5D: a measure of health status from the EuroQol Group.  
43  
44 *Ann Med* 2001;33(5):337-43.  
45  
46
- 47 16. Broadbent E, Petrie KJ, Main J, *et al.* The brief illness perception questionnaire. *J*  
48  
49 *Psychosom Res* 2006;60(6):631-7.  
50  
51  
52  
53  
54  
55  
56  
57  
58  
59  
60

- 1  
2  
3  
4 17. Oldridge N, Hofer S, McGee H, *et al*. The HeartQoL: Part I. Development of a new  
5 core health-related quality of life questionnaire for patients with ischemic heart disease.  
6  
7  
8  
9 *Eur J Prev Cardiol* 2013 Apr 25 [Epub ahead of print].  
10  
11  
12 18. Oldridge N, Hofer S, McGee H, *et al*. The HeartQoL: Part II. Validation of a new core  
13 health-related quality of life questionnaire for patients with ischemic heart disease. *Eur J*  
14  
15  
16  
17 *Prev Cardiol* 2013 Apr 25 [Epub ahead of print].  
18  
19  
20 19. Oldridge N, Saner H, McGee HM, HeartQoL Study Investigators. The Euro Cardio-QoL  
21 Project. An international study to develop a core heart disease health-related quality of life  
22  
23  
24  
25  
26  
27  
28  
29  
30  
31  
32  
33 20. Chang VT, Hwang SS, Feuerman M. Validation of the Edmonton Symptom  
34  
35  
36  
37  
38  
39  
40  
41  
42  
43  
44  
45  
46  
47  
48  
49  
50  
51  
52  
53  
54  
55  
56  
57  
58  
59  
60  
21. Thygesen LC, Daasnes C, Thaulow I, *et al*. Introduction to Danish (nationwide)  
registers on health and social issues: structure, access, legislation, and archiving. *Scand J*  
*Public Health* 2011;39(7 Suppl):12-6.  
22. Pedersen CB. The Danish Civil Registration System. *Scand J Public Health* 2011;39(7  
Suppl):22-5.  
23. Lynge E, Sandegaard JL, Rebolj M. The Danish National Patient Register. *Scand J*  
*Public Health* 2011;39(7 Suppl):30-3.  
24. Andersen JS, Olivarius Nde F, Krasnik A. The Danish National Health Service  
Register. *Scand J Public Health* 2011;39(7 Suppl):34-7.

1  
2  
3  
4 25. Petersson F, Baadsgaard M, Thygesen LC. Danish registers on personal labour  
5 market affiliation. *Scand J Public Health* 2011;39(7 Suppl):95-8.  
6  
7

8  
9 26. Jensen VM, Rasmussen AW. Danish Education Registers. *Scand J Public Health*  
10 2011;39(7 Suppl):91-4.  
11  
12

13  
14 27. Baadsgaard M, Quitzau J. Danish registers on personal income and transfer  
15 payments. *Scand J Public Health* 2011;39(7 Suppl):103-5.  
16  
17  
18

19  
20 28. Christensen AI, Ekholm O, Glumer C, *et al.* The Danish National Health Survey 2010.  
21 Study design and respondent characteristics. *Scand J Public Health* 2012;40(4):391-7.  
22  
23

24  
25 29. Ekholm O, Gundgaard J, Rasmussen NK, *et al.* The effect of health, socio-economic  
26 position, and mode of data collection on non-response in health interview surveys. *Scand*  
27 *J Public Health* 2010;38(7):699-706.  
28  
29  
30  
31  
32  
33  
34  
35  
36  
37  
38  
39  
40  
41  
42  
43  
44  
45  
46  
47  
48  
49  
50  
51  
52  
53  
54  
55  
56  
57  
58  
59  
60

## STROBE Statement—checklist of items that should be included in reports of observational studies

|                              | Item No | Recommendation                                                                                                                                                                                                                                                                                                                                                                                                                                                                                                           |
|------------------------------|---------|--------------------------------------------------------------------------------------------------------------------------------------------------------------------------------------------------------------------------------------------------------------------------------------------------------------------------------------------------------------------------------------------------------------------------------------------------------------------------------------------------------------------------|
| <b>Title and abstract</b>    | 1       | (a) Indicate the study's design with a commonly used term in the title or the abstract<br>Page 1<br>(b) Provide in the abstract an informative and balanced summary of what was done and what was found<br>Page 2-3                                                                                                                                                                                                                                                                                                      |
| <b>Introduction</b>          |         |                                                                                                                                                                                                                                                                                                                                                                                                                                                                                                                          |
| Background/rationale         | 2       | Explain the scientific background and rationale for the investigation being reported<br>Page 4                                                                                                                                                                                                                                                                                                                                                                                                                           |
| Objectives                   | 3       | State specific objectives, including any prespecified hypotheses<br>Page 5                                                                                                                                                                                                                                                                                                                                                                                                                                               |
| <b>Methods</b>               |         |                                                                                                                                                                                                                                                                                                                                                                                                                                                                                                                          |
| Study design                 | 4       | Present key elements of study design early in the paper<br>Page 5                                                                                                                                                                                                                                                                                                                                                                                                                                                        |
| Setting                      | 5       | Describe the setting, locations, and relevant dates, including periods of recruitment, exposure, follow-up, and data collection<br>Page 5-6                                                                                                                                                                                                                                                                                                                                                                              |
| Participants                 | 6       | <i>Cross-sectional study</i> —Give the eligibility criteria, and the sources and methods of selection of participants<br>Page 6                                                                                                                                                                                                                                                                                                                                                                                          |
| Variables                    | 7       | Clearly define all outcomes, exposures, predictors, potential confounders, and effect modifiers. Give diagnostic criteria, if applicable<br>Page 10                                                                                                                                                                                                                                                                                                                                                                      |
| Data sources/<br>measurement | 8*      | For each variable of interest, give sources of data and details of methods of assessment (measurement). Describe comparability of assessment methods if there is more than one group<br>Page 7-10                                                                                                                                                                                                                                                                                                                        |
| Bias                         | 9       | Describe any efforts to address potential sources of bias<br>Page 11, 14, 16                                                                                                                                                                                                                                                                                                                                                                                                                                             |
| Study size                   | 10      | Explain how the study size was arrived at<br>Page 11-12                                                                                                                                                                                                                                                                                                                                                                                                                                                                  |
| Quantitative variables       | 11      | Explain how quantitative variables were handled in the analyses. If applicable, describe which groupings were chosen and why<br>Not applicable (analyses not done yet)                                                                                                                                                                                                                                                                                                                                                   |
| Statistical methods          | 12      | (a) Describe all statistical methods, including those used to control for confounding<br>(b) Describe any methods used to examine subgroups and interactions<br>(c) Explain how missing data were addressed<br>(d) <i>Cohort study</i> —If applicable, explain how loss to follow-up was addressed<br><i>Case-control study</i> —If applicable, explain how matching of cases and controls was addressed<br><i>Cross-sectional study</i> —If applicable, describe analytical methods taking account of sampling strategy |

(e) Describe any sensitivity analyses

Page 12-14

| <b>Results</b>           |     | <b>No results as this is a research protocol</b>                                                                                                                                                                                                                                                                                                                                                              |
|--------------------------|-----|---------------------------------------------------------------------------------------------------------------------------------------------------------------------------------------------------------------------------------------------------------------------------------------------------------------------------------------------------------------------------------------------------------------|
| Participants             | 13* | (a) Report numbers of individuals at each stage of study—eg numbers potentially eligible, examined for eligibility, confirmed eligible, included in the study, completing follow-up, and analysed<br>(b) Give reasons for non-participation at each stage<br>(c) Consider use of a flow diagram                                                                                                               |
| Descriptive data         | 14* | (a) Give characteristics of study participants (eg demographic, clinical, social) and information on exposures and potential confounders<br>(b) Indicate number of participants with missing data for each variable of interest<br>(c) <i>Cohort study</i> —Summarise follow-up time (eg, average and total amount)                                                                                           |
| Outcome data             | 15* | <i>Cohort study</i> —Report numbers of outcome events or summary measures over time<br><i>Case-control study</i> —Report numbers in each exposure category, or summary measures of exposure<br><i>Cross-sectional study</i> —Report numbers of outcome events or summary measures                                                                                                                             |
| Main results             | 16  | (a) Give unadjusted estimates and, if applicable, confounder-adjusted estimates and their precision (eg, 95% confidence interval). Make clear which confounders were adjusted for and why they were included<br>(b) Report category boundaries when continuous variables were categorized<br>(c) If relevant, consider translating estimates of relative risk into absolute risk for a meaningful time period |
| Other analyses           | 17  | Report other analyses done—eg analyses of subgroups and interactions, and sensitivity analyses                                                                                                                                                                                                                                                                                                                |
| <b>Discussion</b>        |     |                                                                                                                                                                                                                                                                                                                                                                                                               |
| Key results              | 18  | Summarise key results with reference to study objectives<br>Not applicable (no results yet)                                                                                                                                                                                                                                                                                                                   |
| Limitations              | 19  | Discuss limitations of the study, taking into account sources of potential bias or imprecision. Discuss both direction and magnitude of any potential bias<br>Page 15-16                                                                                                                                                                                                                                      |
| Interpretation           | 20  | Give a cautious overall interpretation of results considering objectives, limitations, multiplicity of analyses, results from similar studies, and other relevant evidence<br>Not applicable (no results yet)                                                                                                                                                                                                 |
| Generalisability         | 21  | Discuss the generalisability (external validity) of the study results<br>Not applicable (no results yet)                                                                                                                                                                                                                                                                                                      |
| <b>Other information</b> |     |                                                                                                                                                                                                                                                                                                                                                                                                               |
| Funding                  | 22  | Give the source of funding and the role of the funders for the present study and, if applicable, for the original study on which the present article is based<br>Page 17                                                                                                                                                                                                                                      |

\*Give information separately for cases and controls in case-control studies and, if applicable, for exposed and unexposed groups in cohort and cross-sectional studies.

**Note:** An Explanation and Elaboration article discusses each checklist item and gives methodological background and published examples of transparent reporting. The STROBE checklist is best used in conjunction with this article (freely available on the Web sites of PLoS Medicine at <http://www.plosmedicine.org/>, Annals of Internal Medicine at



1  
2 <http://www.annals.org/>, and Epidemiology at <http://www.epidem.com/>). Information on the STROBE Initiative is  
3 available at [www.strobe-statement.org](http://www.strobe-statement.org).  
4  
5  
6  
7  
8  
9  
10  
11  
12  
13  
14  
15  
16  
17  
18  
19  
20  
21  
22  
23  
24  
25  
26  
27  
28  
29  
30  
31  
32  
33  
34  
35  
36  
37  
38  
39  
40  
41  
42  
43  
44  
45  
46  
47  
48  
49  
50  
51  
52  
53  
54  
55  
56  
57  
58  
59  
60

For peer review only

# BMJ Open

## Patient reported outcomes at hospital discharge from Heart Centres, a national cross-sectional survey with register based follow-up: The DenHeart study protocol.

|                                 |                                                                                                                                                                                                                                                                                                                                                                                                                                                                                                                                                                                                                                                                                                                                                                                      |
|---------------------------------|--------------------------------------------------------------------------------------------------------------------------------------------------------------------------------------------------------------------------------------------------------------------------------------------------------------------------------------------------------------------------------------------------------------------------------------------------------------------------------------------------------------------------------------------------------------------------------------------------------------------------------------------------------------------------------------------------------------------------------------------------------------------------------------|
| Journal:                        | <i>BMJ Open</i>                                                                                                                                                                                                                                                                                                                                                                                                                                                                                                                                                                                                                                                                                                                                                                      |
| Manuscript ID:                  | bmjopen-2013-004709.R1                                                                                                                                                                                                                                                                                                                                                                                                                                                                                                                                                                                                                                                                                                                                                               |
| Article Type:                   | Protocol                                                                                                                                                                                                                                                                                                                                                                                                                                                                                                                                                                                                                                                                                                                                                                             |
| Date Submitted by the Author:   | 09-Apr-2014                                                                                                                                                                                                                                                                                                                                                                                                                                                                                                                                                                                                                                                                                                                                                                          |
| Complete List of Authors:       | Berg, Selina; Rigshospitalet, Heart Centre<br>Svanholm, Jette; Aarhus University Hospital, Department of Cardiology<br>Lauberg, Astrid; Aalborg University Hospital, Department of Cardiology and Department of Cardiothoracic Surgery<br>Borregaard, Britt; Odense University Hospital, Department of Thoracic, Cardiac and Vascular Surgery<br>Herning, Margrethe; Gentofte Hospital, Department of Cardiology<br>Mygind, Anna; Aarhus University Hospital, Department of Cardiology<br>Christensen, Anne; Rigshospitalet, Heart Centre<br>Christensen, Anne; National Institute of Public Health,<br>Ekholm, Ola; National Institute of Public Health,<br>Juel, Knud; National Institute of Public Health,<br>Thrysoe, Lars; Odense University Hospital, Department of Cardiology |
| <b>Primary Subject Heading</b>: | Cardiovascular medicine                                                                                                                                                                                                                                                                                                                                                                                                                                                                                                                                                                                                                                                                                                                                                              |
| Secondary Subject Heading:      | Cardiovascular medicine                                                                                                                                                                                                                                                                                                                                                                                                                                                                                                                                                                                                                                                                                                                                                              |
| Keywords:                       | CARDIOLOGY, Valvular heart disease < CARDIOLOGY, Ischaemic heart disease < CARDIOLOGY, Heart failure < CARDIOLOGY                                                                                                                                                                                                                                                                                                                                                                                                                                                                                                                                                                                                                                                                    |
|                                 |                                                                                                                                                                                                                                                                                                                                                                                                                                                                                                                                                                                                                                                                                                                                                                                      |

SCHOLARONE™  
Manuscripts

**Patient reported outcomes at hospital discharge from Heart Centres, a national cross-sectional survey with register based follow-up: The DenHeart study protocol.**

Selina Kikkenborg Berg, RN, MScN, Ph.D.<sup>1,2</sup>

Jette Svanholm, RN, MSc, Ph.D.<sup>3</sup>

Astrid Lauberg, RN, MScN<sup>4</sup>

Britt Borregaard, RN, MPQM<sup>5</sup>

Margrethe HERNING, RN, MED<sup>2</sup>

Anna Mygind, MSPH, Ph.D.<sup>3</sup>

Anne Vinggaard Christensen, MSPH<sup>1</sup>

Anne Illemann Christensen, MSPH<sup>6</sup>

Ola Ekholm, MSc<sup>6</sup>

Knud Juel, Ph.D.<sup>6</sup>

Lars Thrysoe, RN, MLP, Ph.D.<sup>7</sup>

1. The Heart Centre, Unit 2151, Rigshospitalet, Copenhagen University Hospital Blegdamsvej 9, 2100 Copenhagen, Denmark
2. Department of Cardiology, Gentofte University Hospital, Niels Andersens Vej 65, 2900 Hellerup, Denmark
3. Department of Cardiology, Aarhus University Hospital, Brendstrupgaardsvej 100, 8200 Aarhus N, Denmark
4. Department of Cardiology and Department of Cardiothoracic Surgery, Aalborg University Hospital, Hobrovej 18-22, 9000 Aalborg, Denmark
5. Department of Thoracic, Cardiac and Vascular Surgery, Odense University Hospital, Sdr. Boulevard 29, 5000 Odense C, Denmark
6. National Institute of Public Health, University of Southern Denmark, Øster Farimagsgade 5A, 1353 Copenhagen, Denmark
7. Department of Cardiology, Odense University Hospital, University of Southern Denmark, Sdr. Boulevard 29, 5000 Odense C, Denmark

**Corresponding author:**

Selina Kikkenborg Berg, PhD.  
Copenhagen University Hospital, Rigshospitalet  
The Heart Centre, unit 2152  
Blegdamsvej 9  
2100 Copenhagen  
Denmark  
E-mail: [selina@rh.dk](mailto:selina@rh.dk)  
Tel: +45 3545 9526

## Abstract

Introduction: Patient reported health status, including symptom burden, functional status and quality of life, is an important measure of health. Differences in health status between diagnostic groups within cardiology have only been sparsely investigated. These outcomes may predict morbidity, mortality, labour market affiliation and health care utilization in various diagnostic groups. A national survey aiming to include all cardiac diagnostic groups from a total Heart Centre population has been designed as the DenHeart survey.

Methods and analysis: DenHeart is designed as a cross-sectional survey with register based follow-up. All diagnostic groups at the five national Heart Centres are included during one year (April 15th 2013 to April 15th 2014) and asked to fill out a questionnaire at hospital discharge. The total eligible population, both responders and non-responders, will be followed in national registers. The following instruments are used: SF-12, HADS, EQ-5D, B-IPQ, HeartQoL and ESAS. The following variables are collected from national registers: action diagnosis, procedures, co-morbidity, length of hospital stay, type of hospitalisation, visits to GP and other agents in primary health care, dispensed prescription medication, vital status, and cause of death. Labour market affiliation, sick leave, early retirement pension, educational degree and income will be collected from registers. Frequency distributions and multiple logistic regression analyses will be used to describe and assess differences in patient reported outcomes at hospital discharge between diagnostic groups and in-hospital predicting factors. Cox proportional hazards regression models with age as the time scale will be used to investigate associations between patient reported outcomes at baseline and morbidity/mortality, labour market affiliation and health care utilization after one year.

1  
2  
3  
4 Ethics and dissemination: The study complies with the Declaration of Helsinki. The study  
5  
6 has been approved by the Danish Data Protection Agency: 2007-58-0015/30-0937. Study  
7  
8 findings will be disseminated widely through peer reviewed publications and conference  
9  
10 presentations.  
11  
12  
13  
14  
15  
16  
17  
18  
19  
20  
21  
22  
23  
24  
25  
26  
27  
28  
29  
30  
31  
32  
33  
34  
35  
36  
37  
38  
39  
40  
41  
42  
43  
44  
45  
46  
47  
48  
49  
50  
51  
52  
53  
54  
55  
56  
57  
58  
59  
60

For peer review only

## Introduction

Patient reported health status, which includes symptom burden, functional status and quality of life, is an important measure of health. Validated patient health status surveys, including disease specific instruments for patients with cardiovascular disease, allow quantification of critical patient-centred outcomes and additional research is needed to better understand the determinants<sup>1</sup> and the predicting factors of patients' health status. Previous studies suggest an association between heart disease, self-reported health and morbidity and mortality, and that patient reported outcome measures can predict prolonged hospital stay, future quality of life, return to work, morbidity and mortality in cardiac patients.<sup>2-7</sup> Quality of life scores seem to provide important prognostic information independent of traditional clinical data, as higher scores have been associated with longer survival in patients with ventricular arrhythmias and coronary artery disease.<sup>8,9</sup> However no studies have included all diagnostic groups within cardiology and comparisons among diagnostic groups are lacking. The overall aim of the DenHeart survey is to gain knowledge about patient reported outcome measures regarding health among cardiac patients at hospital discharge. Knowledge about patients' own perception of their health status and predicting factors can help to guide inpatient practice and outpatient follow-up. Furthermore, a survey combined with register data can be used to evaluate differences among diagnostic groups and predicting factors for patient reported outcome measures at hospital discharge and long-term morbidity and mortality. Also, economic analysis of healthcare utilisation and work ability status in a large cohort of cardiac patients is needed. Therefore, the DenHeart study is designed as a national survey aiming to include all cardiac diagnostic groups from a total Heart Centre population.

### *Objectives*

The objectives of the DenHeart study are to describe: (i) differences in patient reported outcomes at hospital discharge between diagnostic groups and in-hospital predicting factors and (ii) patient reported outcomes at hospital discharge as a predictor of a) morbidity and mortality, b) labour market affiliation and c) health care utilization after one year.

### **Methods and analysis**

#### *Study design*

The DenHeart study is designed as a cross-sectional survey with register based follow-up. All cardiac patients are asked to fill out a questionnaire at hospital discharge to evaluate patient reported outcomes. Furthermore, the total eligible population, both responders and non-responders, will be followed in national registers.

#### *Setting and participants*

The five Heart Centres in Denmark are including patients during a one year period, from April 15<sup>th</sup> 2013 to April 15<sup>th</sup> 2014. One centre began data collection later, May 1<sup>st</sup> 2013. Four heart centres have both medical and surgical wards, one centre medical wards only. All cardiac patients discharged or transferred to a local hospital from one of the Heart Centres are potential participants in the study. Patients are unselected and consecutively included at hospital discharge. Included patients are asked to complete and return a questionnaire before they leave the hospital or alternatively to do so at home within 3 days of discharge and return it by mail. Patients who are transferred to another hospital are given the questionnaire at discharge from the Heart Centre and asked to fill it out at the

1  
2  
3  
4 day of hospital discharge or alternatively to do so at home within 3 days of discharge and  
5  
6 then return it by mail.  
7

### 8 9 *Eligibility criteria*

10 All diagnostic groups within cardiology are included. Patients with ischemic heart disease  
11 (e.g. coronary angiography, percutaneous coronary intervention), heart failure (e.g. heart  
12 transplantation), arrhythmia (e.g. ablation, labyrinth, pacemaker, implantable cardioverter  
13 defibrillator), heart valve disease (e.g. valve replacement), endocarditis and congenital  
14 heart disease (e.g. atrium septum defect, patent ductus arteriosus, patent foramen ovale,  
15 coarctatio) are diagnosed and treated at the Heart Centres. Infrequent conditions such as  
16 thorax-trauma are also included. Patients are grouped by their primary action diagnose  
17 and will only be included in one group.  
18  
19

20 Patients under 18 years of age and patients without a Danish civil registration number are  
21 excluded from the study. For ethical reasons, patients who are unconscious when  
22 transferred are also excluded.  
23  
24

25 Reasons for non-response are recorded which allows for sub-analyses of these groups.  
26

27 On the front page of the questionnaire there is a box that enables the patient or nurse to  
28 tick off the reason for non-response: "Does not wish to participate", "Not able to participate  
29 because of illness", "Not able to participate because of language barrier", "Questionnaire  
30 not handed out" and "Other".  
31  
32  
33  
34  
35  
36  
37  
38  
39  
40  
41  
42  
43  
44  
45  
46  
47  
48  
49  
50  
51  
52  
53  
54  
55  
56  
57  
58  
59  
60



### Recruitment

Patients are recruited at hospital discharge (the same day or the day before discharge) by the ward nurse in charge of the discharge of the individual patients or by a research nurse.

All nurses at the centres, approximately 800, have been informed about the study and procedures at ward meetings, guidelines have been distributed and a website created ([www.DenHeart.dk](http://www.DenHeart.dk)). When informing patients about the study and handing out the questionnaire, nurses also distribute a postage pre-paid envelope for the return of the questionnaire, either at the ward or after discharge. No reminders are sent to patients as the time window of three days post discharge makes it impossible. Distribution and return rates are monitored to allow for interventions if the rates drop during data collection. No specific cut off is set for low rates calling for interventions. Instead monthly discussions on each site and in the national research group are undertaken allowing for discussions and ideas for reminding the staff to hand out the questioners. *Data sources/measurement*

The following patient reported outcome measures are used: Short-form 12 (SF-12), Hospital Anxiety and Depression Scale (HADS), EQ-5D, Brief Illness Perception Questionnaire (B-IPQ), HeartQoL and Edmonton Symptom Assessment Scale (ESAS). Both EQ5D and SF-12 are generic health instruments. SF-12 is included to be able to compare to a national general population and EQ5D is included due to a different scale composition.

SF-12: The SF-12 is a 12-item version of the SF-36 and is a brief, reliable measure of overall health. The questionnaire measures eight domains of health: physical function, role-physical, bodily pain, general health, vitality, social functioning, role-emotional and mental health with higher scores indicating better health status. The items cover the previous four weeks and results are expressed in terms of two summary scores: the

1  
2  
3  
4 Physical Component Summary (PCS) and the Mental Component Summary (MCS).<sup>10</sup> A  
5  
6 Cronbach's alpha of 0.87 and 0.84 for PCS-12 and MCS-12 respectively have been  
7  
8 reported in a population of coronary heart disease patients.<sup>11</sup> The SF-12 is a suitable for  
9  
10 studies focusing on patient-based assessment of physical and mental health.<sup>10</sup>  
11  
12 Furthermore it is used in the National Health Surveys and outcomes can be compared.  
13  
14

15  
16 HADS: HADS is a 14-item questionnaire that assesses levels of depression and anxiety in  
17  
18 medically ill patients admitted to non-psychiatric hospital clinics. The scale offers two  
19  
20 scores, HADS-A and HADS-D, and consists of seven questions to assess anxiety and  
21  
22 seven questions to assess depression.<sup>12</sup> For each of the questions the respondent  
23  
24 chooses from four responses to indicate the extent to which each applies for the last week.  
25  
26 HADS is a valid and internally consistent measure, with a mean Cronbach's alpha of 0.83  
27  
28 and 0.82 for the HADS-A and HADS-D respectively.<sup>13</sup> Scores of 0 to 7 for either subscale  
29  
30 are regarded as normal and scores of 8 to 10 suggest the presence of a mood disorder.  
31  
32 Scores of 11 and above indicate the probable presence of a mood disorder.<sup>14</sup>  
33  
34  
35

36  
37 EQ-5D: The EQ-5D is a 6-item standardised instrument for measuring current health  
38  
39 status that provides a simple descriptive profile and a single index value that can be used  
40  
41 in clinical and economic evaluation of health care and in population health surveys. The  
42  
43 questionnaire covers five dimensions of health: mobility, self-care, usual activities,  
44  
45 pain/discomfort and anxiety/depression. Each dimension is divided into three levels: no  
46  
47 problems, some or moderate problems or extreme problems. . The sixth item a Visual  
48  
49 Analogue Scale enables the respondent to provide a self-rating of his/her own health.  
50  
51 Higher scores indicate better health status.<sup>15</sup> An overall Cronbach's alpha of 0.73 has been  
52  
53 found in a population of coronary heart disease patients.<sup>11</sup>  
54  
55  
56  
57  
58  
59  
60

1  
2  
3  
4 B-IPQ: B-IPQ is a short 8-item questionnaire that assesses cognitive and emotional  
5  
6 representations of illness. The eight items each represent a dimension of the respondent's  
7  
8 perception of his or her own illness. Five items assess current cognitive representations of  
9  
10 illness: consequences, timeline, personal control, treatment control and identity. Two items  
11  
12 assess emotional representations of illness: concern and emotions. The last item  
13  
14 assesses illness comprehensibility. A higher score on the B-IPQ reflects a more  
15  
16 threatening view of illness. B-IPQ has good test-retest reliability measured with Pearson  
17  
18 correlations and has shown good predictive validity among patients recovering from  
19  
20 myocardial infarction.<sup>16</sup>  
21  
22  
23

24  
25 HeartQoL: HeartQoL is an 14-item illness specific questionnaire that measures quality of  
26  
27 life (QoL) in cardiac patients. The questionnaire covers the previous four weeks and  
28  
29 produces a global score and two subscales. A physical and an emotional scale with higher  
30  
31 scores indicating better QoL status. HeartQoL is a new questionnaire developed on the  
32  
33 basis of items from three widely used questionnaires for specific groups of cardiac patients  
34  
35 (Seattle Angina Questionnaire, MacNew Heart Disease Health-related Quality of Life  
36  
37 Questionnaire and Minnesota Living with Heart Failure questionnaire). The questionnaire  
38  
39 has proven to be a reliable instrument with a Cronbach's alpha between 0.80-0.91 for the  
40  
41 global score and each subscale and to be responsive in patients with a wide spectrum of  
42  
43 diagnoses.<sup>17-19</sup> ESAS: ESAS is a 10-item questionnaire that allows patients to rate their  
44  
45 current symptoms on a visual numeric scale. The following symptoms are included: pain,  
46  
47 tiredness, nausea, depression, anxiety, drowsiness, appetite, well-being, shortness of  
48  
49 breath and distress. Higher scores indicate the presence and intensity of the symptoms.  
50  
51  
52 ESAS has proven to be a valid instrument to measure cancer patients' self-reported  
53  
54 symptoms with an overall Cronbach's alpha of 0.79.<sup>20</sup> Even though ESAS was developed  
55  
56  
57  
58  
59  
60

1  
2  
3  
4 for palliative care in cancer patients, the ESAS has been used in cardiac populations and  
5  
6 there was found modest correlation to NYHA class and heart failure questionnaires.  
7

8<sup>21</sup>Besides the validated questionnaires, 16 questions about health behaviour, cardiac  
9  
10 symptoms, sense of security and use of medicines are included in the questionnaire. This  
11  
12 amounts to a total of 80 items. The questionnaire was pre-tested for feasibility by 12 (10  
13  
14 male, 2 female) patients aged 52-81 years old (mean 65.9) on medical and surgical wards  
15  
16 at three of the Heart Centres, and the introduction and layout was adjusted afterwards.  
17  
18 The questionnaire takes about 20 minutes to complete.  
19

### 20 21 22 *Variables from registers* 23

24  
25 Because all Danish citizens have a unique personal identification number, linkage between  
26  
27 the national registers and other data sources is feasible. Therefore, the Danish registers  
28  
29 offer a great number of possibilities for national epidemiological studies.<sup>22</sup>  
30  
31

32 For the DenHeart study, data are drawn at baseline and follow-up after one year from the  
33  
34 following registers:  
35  
36

37 The Danish Civil Registration System:<sup>23</sup> Gender, age, marital status.  
38  
39

40 The Danish National Patient Register:<sup>24</sup> Action diagnosis, other diagnoses, procedures,  
41  
42 length of hospital stay, type of hospitalisation (acute, heart related, other).  
43  
44

45 The Danish National Health Service Register:<sup>25</sup> Contact with general practitioners and  
46  
47 other agents in primary health care.  
48  
49

50 Registers on personal labour market affiliation:<sup>26</sup> Labour market affiliation, sick leave, early  
51  
52 retirement pension.  
53  
54

55 Population Education Register:<sup>27</sup> Educational degree.  
56  
57  
58  
59  
60

1  
2  
3  
4 The Income Statistics Register.<sup>28</sup> Income.  
5  
6

7 *Data handling and record keeping*  
8

9 Questionnaires are mailed from the Heart Centres or from the patients' home to a  
10 scanning agency (Express A/S). Questionnaires are scanned and the file delivered to The  
11 National Institute of Public Health, University of Southern Denmark and placed on a secure  
12 hard drive. When the data collection is finished, the entire dataset will be reviewed in order  
13 to remove ineligible respondents, e.g. pulmonary trauma. Furthermore, the entire  
14 population of patients discharged from the Heart Centres during the data collection period  
15 will be drawn from the National Patient Register. This will be reviewed in order to remove  
16 irrelevant discharges, in accordance with the inclusion criteria.  
17  
18  
19  
20  
21  
22  
23  
24  
25  
26

27 *Data monitoring*  
28

29 In order to monitor trial conduct, reports are continuously delivered from the scanning  
30 agency in order to identify the need for adjustments. A data file is delivered every two  
31 weeks during the first three months and every month thereafter throughout the entire data  
32 collection period. The data file includes a list of received questionnaires ranked by centre  
33 and unit, and information on whether the questionnaire has been completed on the front  
34 page. The numbers are compared to the number of patients discharged at unit level in the  
35 same period. Assessments of response rates are done and adjustments made if needed.  
36 Low response rates in a unit will lead to contact with the unit concerned to learn the reason  
37 why and actions to increase them. Returned questionnaires will be screened for  
38 systematic errors.  
39  
40  
41  
42  
43  
44  
45  
46  
47  
48  
49  
50  
51  
52  
53  
54  
55  
56  
57  
58  
59  
60

### *Study size*

The study size is not derived statistically, as it consists of the total population of patients discharged from the five Heart Centres in the project period. The five Heart Centres diagnose and treat about 45,000 patients per year. These patients are diagnosed with numerous diseases and conditions and the aim is to describe differences, not only among the most common diagnoses but also the infrequent ones. Thus, all patients discharged from national Heart Centres over one year are included in order to secure as high a level of specificity as possible. Furthermore, by including a large number of participants, a shorter follow-up time is needed. Besides the primary objectives, further ancillary and spin-off analyses will be prepared. Clearly, power calculations cannot be performed prospectively for all potential analyses based on data from the DenHeart study. Moreover, adverse outcomes have very different incidence rates.

### *Response rate*

The final response rate is calculated based on discharge data from the National Patient Register. For calculating the actual number of eligible patients, the following are not included: patients without a Danish civil registration number, patients living in Greenland (no register follow-up possible), patients with two admissions within 24 hours, patients deceased in hospital and outpatient visits. Patients admitted for less than 24 hours without a procedure and readmitted with a procedure within one month are counted once.

Even though patients are encouraged to fill out the questionnaire within 3 days all questionnaires completed within 4 weeks of discharge are included in the analyses.

Patients who have filled out more than one questionnaire during the project period due to repeated hospitalizations will only be counted once (the first questionnaire returned) in the

1  
2  
3  
4 final count of the response rate. The repeated measurements may be included in sub-  
5  
6 analyses.  
7

### 8 9 *Statistical methods*

10  
11 Objective 1: For each diagnostic group, age (mean), sex distribution and patient reported  
12 outcomes at hospital discharge distribution will be reported. Differences between groups  
13 will be tested by use of ANOVA tests for continuous variables and chi-squared tests for  
14 categorical variables. Multivariate logistic regression will be used to investigate the  
15 relationship between diagnostic group and patient reported outcomes when controlling for  
16 response date (number of days since hospital discharge), age, sex and other possible  
17 confounders, and in-hospital predicting factors (e.g. procedure, duration of index hospital  
18 admission, acute/elective admission, stay at intensive care unit, complications).  
19

20  
21 Objective 2a: For each diagnostic group, the crude associations between patient reported  
22 outcome measures at hospital discharge and all-cause and cardiac morbidity and all-  
23 cause and cardiac mortality after one year, will be described and assessed using ANOVA  
24 tests for continuous variables and chi-squared tests for categorical variables. In addition,  
25 multivariate Cox proportional hazards regression models, with age as the time scale, will  
26 be used to examine the associations between patient reported outcome measures at  
27 baseline and all-cause morbidity and mortality and cardiac morbidity and mortality when  
28 adjusting for response date, sex, co-morbidity and other potential confounding factors at  
29 baseline.  
30

31  
32 Objective 2b: For each diagnostic group, the crude associations between patient reported  
33 outcome measures at hospital discharge and labour market affiliation (employment status,  
34 sick leave, early retirement pension) after one year will be described and assessed using  
35  
36  
37  
38  
39  
40  
41  
42  
43  
44  
45  
46  
47  
48  
49  
50  
51  
52  
53  
54  
55  
56  
57  
58  
59  
60

1  
2  
3  
4 the ANOVA tests for continuous variables and chi-squared tests for categorical variables.  
5  
6 Multivariate Cox proportional hazards regression models, with age as the time scale, will  
7  
8 also be carried out to investigate the associations between patient reported outcome  
9  
10 measures at baseline and labour market affiliation when adjusting for potential  
11  
12 confounding factors (e.g. response date, sex, co-morbidity).  
13  
14

15  
16 Objective 2c: For each diagnostic group, the crude associations between patient reported  
17  
18 outcomes measures at hospital discharge and health care utilization (hospitalizations,  
19  
20 contact with general practitioner, medical specialist, and physiotherapist) after one year,  
21  
22 will be described and assessed using the ANOVA tests for continuous variables and chi-  
23  
24 squared tests for categorical variables. Multivariate Cox proportional hazards regression  
25  
26 models, with age as the time scale, will be used to analyse the association between  
27  
28 patient reported outcome measures at baseline and health care utilization when adjusting  
29  
30 for potential confounding variables (e.g. response date, sex, co-morbidity).  
31  
32  
33

### 34 *Weighting*

35  
36 It is possible to link both respondents and non-respondents in the survey on an individual  
37  
38 level to different administrative registers. Thus, non-response weights will be computed  
39  
40 based on register information (e.g. sex and age) in order to reduce non-response bias.  
41  
42

43 Patients with a low probability of response will be given a higher weight in the analyses to  
44  
45 represent the larger number of non-respondents with similar characteristics. Accordingly,  
46  
47 patients more likely to respond will be given a lower weight.  
48  
49

### 50 *Spin-off projects*

51  
52 Several spin-off analyses will be prepared.  
53  
54

### 55 **Ethics and dissemination**

56  
57  
58  
59  
60



1  
2  
3  
4 The study is conducted in accordance with the Declaration of Helsinki. According to  
5  
6 Danish legislation, surveys should not be approved by an ethics committee system but  
7  
8 only by the Danish Data Protection Agency, no. 2007-58-0015/30-0937. The DenHeart  
9  
10 survey is approved by the Institutional Boards of the Heart Centres and registered at  
11  
12 ClinicalTrials.gov (NCT01926145). Patients sign informed consent stating that participation  
13  
14 is voluntary and that further information from patient records may be obtained.  
15  
16

17  
18 The National Institute of Public Health stores data from the DenHeart survey. Access to  
19  
20 data can only be provided to investigators after approval from the Publication Committee.  
21  
22 All study results will be published in international research journals and conference  
23  
24 presentations.  
25  
26

## 27 28 **Discussion**

### 29 30 *Study population*

31  
32 The five Heart Centres treat the most critically ill cardiac patients in Denmark.  
33  
34 Approximately 47 regional or local hospitals treat cardiac patients medically and care for  
35  
36 terminally ill cardiac patients. These patients are underrepresented in the DenHeart study.  
37  
38 The patients in this study represent the patients with diagnoses where medical, invasive or  
39  
40 surgical treatment is possible, and patients with rare conditions such as heart transplant  
41  
42 and congenital heart disease. Furthermore, four of the five Heart Centres have a local  
43  
44 hospital function treating all cardiac diagnoses. One surgical unit did not wish to participate  
45  
46 in the study.  
47  
48  
49  
50

51  
52 Patients who are hospitalised several times in the project period will be asked to fill out the  
53  
54 questionnaire each time. Repeated measures will only be used in sub-analyses. For  
55  
56  
57  
58  
59  
60

1  
2  
3  
4 reporting of primary outcomes, patients will only be counted once (the first questionnaire  
5  
6 returned).  
7

### 8 9 *Variables*

10  
11  
12 The majority of the outcome measures included in the questionnaire is comprised of  
13  
14 validated and standardised instruments to assess patient reported outcomes, which  
15  
16 enhances the validity of the questionnaire. However, in the interpretation of the results, it  
17  
18 must be taken into account that patients with different cardiac conditions differ regarding  
19  
20 how much their health status has changed prior to admission to hospital, and that some of  
21  
22 the instruments have long recall.  
23  
24

### 25 26 *Confounding factors*

27  
28  
29 From previous national health surveys, we know that age and socioeconomic position play  
30  
31 a significant role for non-response. Also, regional differences of about 15 % in response  
32  
33 rates have been documented.<sup>29, 30</sup> The patients treated at the Heart Centres are often aged  
34  
35 and severely ill, which may be reflected in the response rates. This will be accounted for  
36  
37 by reporting both actual responses as well as weighted data for the underrepresented  
38  
39 groups in the analyses. However, several different initiatives are being conducted by the  
40  
41 centres to optimize response rates. Nurses are reminded to hand out the questionnaires at  
42  
43 local meetings, by posters in the ward and logo-pens, and response rates are continuously  
44  
45 shared with the ward nurses in order to secure motivation among the approximately 800  
46  
47 nurses involved in the distribution of questionnaires. Letters are sent to the local hospitals  
48  
49 that receive patients from the Heart Centres asking to remind the patients to fill out the  
50  
51 questionnaire at discharge to home. Some centres are mailing questionnaires to patients  
52  
53 after discharge when they are not handed out in hospital. Mailed questionnaires are sent  
54  
55  
56  
57  
58  
59  
60

1  
2  
3  
4 with overnight post service allowing the questionnaire to be filled out within the 3 days. As  
5  
6 this is a national multicentre study, regional differences in ways to enhance the response  
7  
8 rates may occur. All of these different strategies fall within the frame of the DenHeart study  
9  
10 and timeframe for responding.  
11

### 12 13 **Contributorship**

14  
15  
16  
17 SKB conceived the study. SKB, AVC, MH, LT, BB, JS, AM, AL, AIC, KJ and OE initiated  
18  
19 the study design and implementation. KJ, AIC and OE provided statistical expertise in the  
20  
21 clinical trial design. All contributed to the refinement of the study protocol.  
22  
23

### 24 25 **Funding**

26  
27  
28 This work was supported by the five participating Heart Centres in Denmark. Further  
29  
30 funding will be applied for from external funds.  
31

### 32 33 **Competing interest**

34  
35  
36 No competing interests have been declared by the authors.  
37  
38  
39  
40  
41  
42  
43  
44  
45  
46  
47  
48  
49  
50  
51  
52  
53  
54  
55  
56  
57  
58  
59  
60

## References

1. Rumsfeld JS, Alexander KP, Goff DC, et al. Cardiovascular health: the importance of measuring patient-reported health status: a scientific statement from the American Heart Association. *Circulation* 2013; Jun 4;127(22):2233-49.
2. Pressler SJ, Kim J, Riley P, et al. Memory dysfunction, psychomotor slowing, and decreased executive function predict mortality in patients with heart failure and low ejection fraction. *J Card Fail* 2010; Sep;16(9):750-60.
3. Hoekstra T, Jaarsma T, van Veldhuisen DJ, et al. Quality of life and survival in patients with heart failure. *Eur J Heart Fail* 2012; Sep 18;.
4. Soto GE, Jones P, Weintraub WS, et al. Prognostic value of health status in patients with heart failure after acute myocardial infarction. *Circulation* 2004; Aug 3;110(5):546-51.
5. Heidenreich PA, Spertus JA, Jones PG, et al. Health status identifies heart failure outpatients at risk for hospitalization or death. *J Am Coll Cardiol* 2006; Feb 21;47(4):752-6.
6. Biering K, Nielsen TT, Rasmussen K, et al. Return to work after percutaneous coronary intervention: the predictive value of self-reported health compared to clinical measures. *PLoS One* 2012;7(11):e49268.
7. Szekely A, Nussmeier NA, Miao Y, et al. A multinational study of the influence of health-related quality of life on in-hospital outcome after coronary artery bypass graft surgery. *Am Heart J* 2011; Jun;161(6):1179,1185.e2.

- 1  
2  
3  
4 8. Steinberg JS, Joshi S, Schron EB, et al. Psychosocial status predicts mortality in  
5  
6 patients with life-threatening ventricular arrhythmias. *Heart Rhythm* 2008; Mar;5(3):361-5.  
7  
8
- 9  
10 9. Spertus JA, Jones P, McDonell M, et al. Health status predicts long-term outcome in  
11  
12 outpatients with coronary disease. *Circulation* 2002; Jul 2;106(1):43-9.  
13
- 14  
15 10. Ware J, Jr, Kosinski M, Keller SD. A 12-Item Short-Form Health Survey: construction of  
16  
17 scales and preliminary tests of reliability and validity. *Med Care* 1996; Mar;34(3):220-33.  
18  
19
- 20  
21 11. De Smedt D, Clays E, Doyle F, et al. Validity and reliability of three commonly used  
22  
23 quality of life measures in a large European population of coronary heart disease patients.  
24  
25 *Int J Cardiol* 2013; Sep 1;167(5):2294-9.  
26  
27
- 28  
29 12. Zigmond AS, Snaith RP. The hospital anxiety and depression scale. *Acta Psychiatr*  
30  
31 *Scand* 1983; Jun;67(6):361-70.  
32  
33
- 34  
35 13. Bjelland I, Dahl AA, Haug TT, et al. The validity of the Hospital Anxiety and Depression  
36  
37 Scale. An updated literature review. *J Psychosom Res* 2002; Feb;52(2):69-77.  
38  
39
- 40  
41 14. Snaith RP. The Hospital Anxiety And Depression Scale. *Health Qual Life Outcomes*  
42  
43 2003; Aug 1;1:29.  
44
- 45  
46 15. Rabin R, de Charro F. EQ-5D: a measure of health status from the EuroQol Group.  
47  
48 *Ann Med* 2001; Jul;33(5):337-43.  
49
- 50  
51 16. Broadbent E, Petrie KJ, Main J, et al. The brief illness perception questionnaire. *J*  
52  
53 *Psychosom Res* 2006; Jun;60(6):631-7.  
54  
55  
56  
57  
58  
59  
60

1  
2  
3  
4 17. Oldridge N, Hofer S, McGee H, et al: Part I. Development of a new core health-related  
5  
6 quality of life questionnaire for patients with ischemic heart disease. *Eur J Prev Cardiol*  
7  
8 2012; Jul 20;.

9  
10  
11 18. Oldridge N, Hofer S, McGee H, C et al: Part II. Validation of a new core health-related  
12  
13 quality of life questionnaire for patients with ischemic heart disease. *Eur J Prev Cardiol*  
14  
15 2012; Jul 20;.

16  
17  
18 19. Oldridge N, Saner H, McGee HM, et al. The Euro Cardio-QoL Project. An international  
19  
20 study to develop a core heart disease health-related quality of life questionnaire, the  
21  
22 HeartQoL. *Eur J Cardiovasc Prev Rehabil* 2005; Apr;12(2):87-94.  
23  
24

25  
26  
27 20. Chang VT, Hwang SS, Feuerman M. Validation of the Edmonton Symptom  
28  
29 Assessment Scale. *Cancer* 2000; May 1;88(9):2164-71.  
30  
31

32  
33 21. Ezekowitz JA, Thai V, Hodnefield TS, et al. The correlation of standard heart failure  
34  
35 assessment and palliative care questionnaires in a multidisciplinary heart failure clinic. *J*  
36  
37 *Pain Symptom Manage* 2011; Sep;42(3):379-87.  
38  
39

40  
41 22. Thygesen LC, Daasnes C, Thaulow I, et al. Introduction to Danish (nationwide)  
42  
43 registers on health and social issues: structure, access, legislation, and archiving. *Scand J*  
44  
45 *Public Health* 2011; Jul;39(7 Suppl):12-6.  
46  
47

48  
49 23. Pedersen CB. The Danish Civil Registration System. *Scand J Public Health* 2011;  
50  
51 Jul;39(7 Suppl):22-5.  
52

53  
54 24. Lynge E, Sandegaard JL, Rebolj M. The Danish National Patient Register. *Scand J*  
55  
56 *Public Health* 2011; Jul;39(7 Suppl):30-3.  
57  
58  
59  
60

- 1  
2  
3  
4 25. Andersen JS, Olivarius Nde F, Krasnik A. The Danish National Health Service  
5  
6 Register. *Scand J Public Health* 2011; Jul;39(7 Suppl):34-7.  
7  
8  
9  
10 26. Petersson F, Baadsgaard M, Thygesen LC. Danish registers on personal labour  
11  
12 market affiliation. *Scand J Public Health* 2011; Jul;39(7 Suppl):95-8.  
13  
14  
15 27. Jensen VM, Rasmussen AW. Danish Education Registers. *Scand J Public Health*  
16  
17 2011; Jul;39(7 Suppl):91-4.  
18  
19  
20  
21 28. Baadsgaard M, Quitzau J. Danish registers on personal income and transfer  
22  
23 payments. *Scand J Public Health* 2011; Jul;39(7 Suppl):103-5.  
24  
25  
26 29. Christensen AI, Ekholm O, Glumer C, et al. The Danish National Health Survey 2010.  
27  
28 Study design and respondent characteristics. *Scand J Public Health* 2012; Jun;40(4):391-  
29  
30 7.  
31  
32  
33  
34 30. Ekholm O, Gundgaard J, Rasmussen NK, et al. The effect of health, socio-economic  
35  
36 position, and mode of data collection on non-response in health interview surveys. *Scand*  
37  
38 *J Public Health* 2010; Nov;38(7):699-706.  
39  
40  
41  
42  
43  
44  
45  
46  
47  
48  
49  
50  
51  
52  
53  
54  
55  
56  
57  
58  
59  
60

**Patient reported outcomes at hospital discharge from Heart Centres, a national cross-sectional survey with register based follow-up: The DenHeart study protocol.**

Selina Kikkenborg Berg, RN, MScN, Ph.D.<sup>1,2</sup>

Jette Svanholm, RN, MSc, Ph.D.<sup>3</sup>

Astrid Lauberg, RN, MScN<sup>4</sup>

Britt Borregaard, RN, MPQM<sup>5</sup>

Margrethe Herning, RN, MED<sup>2</sup>

Anna Mygind, MSPH, Ph.D.<sup>3</sup>

Anne Vinggaard Christensen, MSPH<sup>1</sup>

Anne Illemann Christensen, MSPH<sup>6</sup>

Ola Ekholm, MSc<sup>6</sup>

Knud Juel, Ph.D.<sup>6</sup>

Lars Thrysoe, RN, MLP, Ph.D.<sup>7</sup>

1. The Heart Centre, Unit 2151, Rigshospitalet, Copenhagen University Hospital Blegdamsvej 9, 2100 Copenhagen, Denmark
2. Department of Cardiology, Gentofte University Hospital, Niels Andersens Vej 65, 2900 Hellerup, Denmark
3. Department of Cardiology, Aarhus University Hospital, Brendstrupgaardsvej 100, 8200 Aarhus N, Denmark
4. Department of Cardiology and Department of Cardiothoracic Surgery, Aalborg University Hospital, Hobrovej 18-22, 9000 Aalborg, Denmark
5. Department of Thoracic, Cardiac and Vascular Surgery, Odense University Hospital, Sdr. Boulevard 29, 5000 Odense C, Denmark
6. National Institute of Public Health, University of Southern Denmark, Øster Farimagsgade 5A, 1353 Copenhagen, Denmark
7. Department of Cardiology, Odense University Hospital, University of Southern Denmark, Sdr. Boulevard 29, 5000 Odense C, Denmark

**Corresponding author:**

Selina Kikkenborg Berg, PhD.  
Copenhagen University Hospital, Rigshospitalet  
The Heart Centre, unit 2152  
Blegdamsvej 9  
2100 Copenhagen  
Denmark  
E-mail: [selina@rh.dk](mailto:selina@rh.dk)  
Tel: +45 3545 9526

Field Code Changed



**Abstract**

Introduction: Patient reported health status, including symptom burden, functional status and quality of life, is an important measure of health. Differences in health status between diagnostic groups within cardiology have only been sparsely investigated. These outcomes may predict morbidity, mortality, labour market affiliation and health care utilization in various diagnostic groups. A national survey aiming to include all cardiac diagnostic groups from a total Heart Centre population has been designed as the DenHeart survey.

Methods and analysis: DenHeart is designed as a cross-sectional survey with register based follow-up. All diagnostic groups at the five national Heart Centres are included during one year (April 15<sup>th</sup> 2013 to April 15<sup>th</sup> 2014) and asked to fill out a questionnaire at hospital discharge. The total eligible population, both responders and non-responders, will be followed in national registers. The following instruments are used: SF-12, HADS, EQ-5D, B-IPQ, HeartQoL and ESAS. The following variables are collected from national registers: action diagnosis, procedures, co-morbidity, length of hospital stay, type of hospitalisation, visits to GP and other agents in primary health care, dispensed prescription medication, vital status, and cause of death. Labour market affiliation, sick leave, early retirement pension, educational degree and income will be collected from registers. Frequency distributions and multiple logistic regression analyses will be used to describe and assess differences in patient reported outcomes at hospital discharge between diagnostic groups and in-hospital predicting factors. Cox proportional hazards regression models with age as the time scale will be used to investigate associations between patient reported outcomes at baseline and morbidity/mortality, labour market affiliation and health care utilization after one year.

1  
2  
3  
4  
5  
6  
7  
8 Ethics and dissemination: The study complies with the Declaration of Helsinki. The study  
9 has been approved by the Danish Data Protection Agency: 2007-58-0015/30-0937. Study  
10 findings will be disseminated widely through peer reviewed publications and conference  
11 presentations.  
12  
13  
14

15  
16 Trial registration: ClinicalTrials.gov: NCT01926145.  
17  
18  
19  
20  
21  
22  
23  
24  
25  
26  
27  
28  
29  
30  
31  
32  
33  
34  
35  
36  
37  
38  
39  
40  
41  
42  
43  
44  
45  
46  
47  
48  
49  
50  
51  
52  
53  
54  
55  
56  
57  
58  
59  
60

## Introduction

Patient reported health status, which includes symptom burden, functional status and quality of life, is an important measure of health. Validated patient health status surveys, including disease specific instruments for patients with cardiovascular disease, allow quantification of critical patient-centred outcomes and additional research is needed to better understand the determinants<sup>1</sup> and the predicting factors of patients' health status. Previous studies suggest an association between heart disease, self-reported health and morbidity and mortality, and that patient reported outcome measures can predict prolonged hospital stay, future quality of life, return to work, morbidity and mortality in cardiac patients.<sup>2-7</sup> Quality of life scores seem to provide important prognostic information independent of traditional clinical data, as higher scores have been associated with longer survival in patients with ventricular arrhythmias and coronary artery disease.<sup>8, 9</sup> However no studies have included all diagnostic groups within cardiology and comparisons among diagnostic groups are lacking. The overall aim of the DenHeart survey is to gain knowledge about patient reported outcome measures regarding health among cardiac patients at hospital discharge. Knowledge about patients' own perception of their health status and predicting factors can help to guide inpatient practice and outpatient follow-up. Furthermore, a survey combined with register data can be used to evaluate differences among diagnostic groups and predicting factors for patient reported outcome measures at hospital discharge and long-term morbidity and mortality. Also, economic analysis of healthcare utilisation and work ability status in a large cohort of cardiac patients is needed. Therefore, the DenHeart study is designed as a national survey aiming to include all cardiac diagnostic groups from a total Heart Centre population.

### *Objectives*

The objectives of the DenHeart study are to describe: (i) differences in patient reported outcomes at hospital discharge between diagnostic groups and in-hospital predicting factors and (ii) patient reported outcomes at hospital discharge as a predictor of a) morbidity and mortality, b) labour market affiliation and c) health care utilization after one year.

### **Methods and analysis**

#### *Study design*

The DenHeart study is designed as a cross-sectional survey with register based follow-up. All cardiac patients are asked to fill out a questionnaire at hospital discharge to evaluate patient reported outcomes. Furthermore, the total eligible population, both responders and non-responders, will be followed in national registers.

#### *Setting and participants*

The five Heart Centres in Denmark are including patients during a one year period, from April 15<sup>th</sup> 2013 to April 15<sup>th</sup> 2014. One centre began data collection later, May 1<sup>st</sup> 2013. Four heart centres have both medical and surgical wards, one centre medical wards only. All cardiac patients discharged or transferred to a local hospital from one of the Heart Centres are potential participants in the study. Patients are unselected and consecutively included at hospital discharge. Included patients are asked to complete and return a questionnaire before they leave the hospital or alternatively to do so at home within 3 days of discharge and return it by mail. Patients who are transferred to another hospital are given the questionnaire at discharge from the Heart Centre and asked to fill it out at the

1  
2  
3  
4  
5  
6  
7  
8 day of hospital discharge or alternatively to do so at home within 3 days of discharge and  
9 then return it by mail.

### 11 *Eligibility criteria*

12 All diagnostic groups within cardiology are included. Patients with ischemic heart disease  
13 (e.g. coronary angiography, percutaneous coronary intervention), heart failure (e.g.  
14 ~~coronary artery bypass graft~~, heart transplantation), arrhythmia (e.g. ablation, labyrinth,  
15 pacemaker, implantable cardioverter defibrillator), heart valve disease (e.g. ~~stent~~, valve  
16 replacement), endocarditis and congenital heart disease (e.g. atrium septum defect, patent  
17 ductus arteriosus, patent foramen ovale, coarctatio) are diagnosed and treated at the  
18 Heart Centres. Infrequent conditions such as thorax-trauma are also included. [Patients are  
19 grouped by their primary action diagnose and will only be included in one group.](#)

20 Patients under 18 years of age and patients without a Danish civil registration number are  
21 excluded from the study. For ethical reasons, patients who are unconscious when  
22 transferred are also excluded.

23 Reasons for non-response are recorded which allows for sub-analyses of these groups.

24 On the front page of the questionnaire there is a box that enables the patient or nurse to  
25 tick off the reason for non-response: "Does not wish to participate", "Not able to participate  
26 because of illness", "Not able to participate because of language barrier", "Questionnaire  
27 not handed out" and "Other".

### 28 *Recruitment*

29 Patients are recruited at hospital discharge (the same day or the day before discharge) by  
30 the ward nurse in charge of the discharge of the individual patients or by a research nurse.  
31 All nurses at the centres, approximately 800, have been informed about the study and

1  
2  
3  
4  
5  
6  
7  
8 procedures at ward meetings, guidelines have been distributed and a website created  
9  
10 (www.DenHeart.dk). When informing patients about the study and handing out the  
11 questionnaire, nurses also distribute a postage pre-paid envelope ~~for the to them to~~ return  
12 ~~of~~ the questionnaire ~~in~~, either at the ward or after discharge. No reminders are sent to  
13 patients as the time window of three days post discharge makes it impossible. Distribution  
14 and return rates are monitored to allow for interventions if the rates drop during data  
15 collection. No specific cut off is set for low rates calling for interventions. Instead monthly  
16 discussions on each site and in the national research group are undertaken allowing for  
17 discussions and ideas for reminding the staff to hand out the questioners.

#### 25 *Data sources/measurement*

26  
27 The following patient reported outcome measures are used: Short-form 12 (SF-12),  
28 Hospital Anxiety and Depression Scale (HADS), EQ-5D, Brief Illness Perception  
29 Questionnaire (B-IPQ), HeartQoL and Edmonton Symptom Assessment Scale (ESAS).  
30  
31

32  
33 Both EQ5D and SF-12 are generic health instruments. SF-12 is included to be able to  
34 compare to a national general population and EQ5D is included due to a different scale  
35 composition.

Formatted: Font: (Default) Arial

Formatted: Font: (Default) Arial

Formatted: Font: (Default) Arial

Formatted: Font: (Default) Arial

36  
37  
38  
39 SF-12: The SF-12 is a 12-item version of the SF-36 and is a brief, reliable measure of  
40 overall health. The questionnaire measures eight domains of health: physical function,  
41 role-physical, bodily pain, general health, vitality, social functioning, role-emotional and  
42 mental health with higher scores indicating better health status. The items cover the  
43 previous four weeks and results are expressed in terms of two summary scores: the  
44 Physical Component Summary (PCS) and the Mental Component Summary (MCS).<sup>10</sup> A  
45 Cronbach's alpha of 0.87 and 0.84 for PCS-12 and MCS-12 respectively have been  
46 reported in a population of coronary heart disease patients.<sup>11</sup> The SF-12 is a suitable for  
47  
48  
49  
50  
51  
52  
53  
54

1  
2  
3  
4  
5  
6  
7  
8 studies focusing on patient-based assessment of physical and mental health.<sup>10</sup>

9  
10 Furthermore it is used in the National Health Surveys and outcomes can be compared.

11  
12 HADS: HADS is a 14-item questionnaire that assesses levels of depression and anxiety in

13  
14 medically ill patients [admitted to non-psychiatric hospital clinics](#). The scale offers two

15  
16 scores, HADS-A and HADS-D, and consists of seven questions to assess anxiety and

17  
18 seven questions to assess depression.<sup>12</sup> For each of the questions the respondent

19  
20 chooses from four responses to indicate the extent to which each applies for the last week.

21  
22 HADS is a valid and internally consistent measure, with a mean Cronbach's alpha of 0.83

23  
24 and 0.82 for the HADS-A and HADS-D respectively.<sup>13</sup> Scores of 0 to 7 for either subscale

25  
26 are regarded as normal and scores of 8 to 10 suggest the presence of a mood disorder.

27  
28 Scores of 11 and above indicate the probable presence of a mood disorder.<sup>14</sup>

29  
30 EQ-5D: The EQ-5D is a [6-item](#) standardised instrument for measuring current health

31  
32 status that provides a simple descriptive profile and a single index value that can be used

33  
34 in clinical and economic evaluation of health care and in population health surveys. The

35  
36 questionnaire covers five dimensions of health: mobility, self-care, usual activities,

37  
38 pain/discomfort and anxiety/depression. Each dimension is divided into three levels: no

39  
40 problems, some or moderate problems or extreme problems. ~~The questionnaire consists~~

41  
42 ~~of a descriptive system produced in a standard layout that enables the respondent to~~

43  
44 ~~classify his/her health according to the five dimensions and a~~. ~~The sixth item a~~ Visual

45  
46 Analogue Scale ~~that~~ enables the respondent to provide a self-rating of his/her own health.

47  
48 Higher scores indicate better health status.<sup>15</sup> An overall Cronbach's alpha of 0.73 has been

49  
50 found in a population of coronary heart disease patients.<sup>11</sup>

Formatted: Font: (Default) Arial, 12 pt, English (U.K.)

Formatted: Font: (Default) Arial, 12 pt, English (U.K.)

1  
2  
3  
4  
5  
6  
7  
8 B-IPQ: B-IPQ is a short [8-item](#) questionnaire that assesses cognitive and emotional  
9 representations of illness ~~on the basis of eight items~~. The eight items each represent a  
10 dimension of the respondent's perception of his or her own illness. Five items assess  
11 current cognitive representations of illness: consequences, timeline, personal control,  
12 treatment control and identity. Two items assess emotional representations of illness:  
13 concern and emotions. The last item assesses illness comprehensibility. A higher score on  
14 the B-IPQ reflects a more threatening view of illness. B-IPQ has good test-retest reliability  
15 measured with Pearson correlations and has shown good predictive validity among  
16 patients recovering from myocardial infarction.<sup>16</sup>

17  
18  
19  
20  
21  
22  
23  
24  
25  
26 HeartQoL: HeartQoL is an [14-item](#) illness specific questionnaire that measures quality of  
27 life (QoL) in cardiac patients. The questionnaire covers the previous four weeks and  
28 produces a global score and two subscales. A physical and an emotional scale with higher  
29 scores indicating better QoL status. HeartQoL is a new questionnaire developed on the  
30 basis of items from three widely used questionnaires for specific groups of cardiac patients  
31 (Seattle Angina Questionnaire, MacNew Heart Disease Health-related Quality of Life  
32 Questionnaire and Minnesota Living with Heart Failure questionnaire). The questionnaire  
33 has proven to be a reliable instrument with a Cronbach's alpha between 0.80-0.91 for the  
34 global score and each subscale and to be responsive in patients with a wide spectrum of  
35 diagnoses.<sup>17-19</sup>

Field Code Changed

36  
37  
38  
39  
40  
41  
42  
43  
44  
45 ESAS: ESAS is a [10-item](#) questionnaire that allows patients to rate their current symptoms  
46 on a visual numeric scale. The following symptoms are included: pain, tiredness, nausea,  
47 depression, anxiety, drowsiness, appetite, well-being, shortness of breath and distress.  
48 Higher scores indicate the presence and intensity of the symptoms. ESAS has proven to  
49 be a valid instrument to measure cancer patients' self-reported symptoms with an overall  
50  
51  
52  
53  
54



1  
2  
3  
4  
5  
6  
7  
8 Cronbach's alpha of 0.79.<sup>20</sup> ~~However, the scale has not yet been evaluated in cardiac~~  
9 ~~patients~~ Even though ESAS was developed for palliative care in cancer patients, the ESAS  
10 ~~-has been used in cardiac populations, and there was found modest correlation to NYHA~~  
11 ~~class and heart failure questionnaires.~~<sup>21</sup>  
12  
13 Besides the validated questionnaires, ~~thirteen~~ 16 questions about health behaviour,  
14 ~~cardiac symptoms,~~ sense of security and use of medicines are included in the  
15  
16 questionnaire. This amounts to a total of ~~80~~ 62 items. The questionnaire was pre-tested for  
17  
18 feasibility by 12 (10 male, 2 female) patients aged 52-81 years old (mean 65.9) on medical  
19  
20 and surgical wards at three of the Heart Centres, and the introduction and layout was  
21  
22 adjusted afterwards. The questionnaire takes about 20 minutes to complete.  
23  
24  
25  
26  
27

#### 28 *Variables from registers*

29  
30 Because all Danish citizens have a unique personal identification number, linkage between  
31  
32 the national registers and other data sources is feasible. Therefore, the Danish registers  
33  
34 offer a great number of possibilities for national epidemiological studies.<sup>22</sup>  
35

36 For the DenHeart study, data are drawn at baseline and follow-up after one year from the  
37  
38 following registers:  
39

40  
41 The Danish Civil Registration System:<sup>23</sup> Gender, age, marital status.  
42

43 The Danish National Patient Register:<sup>24</sup> Action diagnosis, other diagnoses, procedures,  
44  
45 length of hospital stay, type of hospitalisation (acute, heart related, other).  
46  
47

48 The Danish National Health Service Register:<sup>25</sup> Contact with general practitioners and  
49  
50 other agents in primary health care.  
51  
52  
53  
54  
55

Field Code Changed

Formatted: Font: (Default) Arial, 12 pt

Formatted: Font: (Default) Arial, 12 pt

Formatted: Font: (Default) Arial, 12 pt, Font color: Red

Formatted: Font: Font color: Custom Color(RGB(92,92,92)), Kern at 18 pt

Formatted: No underline, Font color: Auto

Formatted: No underline, Font color: Auto

Formatted: No underline, Font color: Auto

1  
2  
3  
4  
5  
6  
7  
8 Registers on personal labour market affiliation:<sup>26</sup> Labour market affiliation, sick leave, early  
9 retirement pension.

10  
11  
12 Population Education Register:<sup>27</sup> Educational degree.

13  
14  
15 The Income Statistics Register:<sup>28</sup> Income.

### 16 17 *Data handling and record keeping*

18  
19 Questionnaires are mailed from the Heart Centres or from the patients' home to a  
20 scanning agency (Express A/S). Questionnaires are scanned and the file delivered to The  
21 National Institute of Public Health, University of Southern Denmark and placed on a secure  
22 hard drive. When the data collection is finished, the entire dataset will be reviewed in order  
23 to remove ineligible respondents, e.g. pulmonary trauma. Furthermore, the entire  
24 population of patients discharged from the Heart Centres during the data collection period  
25 will be drawn from the National Patient Register. This will be reviewed in order to remove  
26 irrelevant discharges, in accordance with the inclusion criteria.

### 27 28 *Data monitoring*

29  
30 In order to monitor trial conduct, reports are continuously delivered from the scanning  
31 agency in order to identify the need for adjustments. A data file is delivered every two  
32 weeks during the first three months and every month thereafter throughout the entire data  
33 collection period. The data file includes a list of received questionnaires ranked by centre  
34 and unit, and information on whether the questionnaire has been completed on the front  
35 page. The numbers are compared to the number of patients discharged at unit level in the  
36 same period. Assessments of response rates are done and adjustments made if needed.

37  
38  
39 Low response rates in a unit will lead to contact with the unit concerned to learn the reason

1  
2  
3  
4  
5  
6  
7  
8 why and actions to increase them. Returned questionnaires will be screened for  
9 systematic errors.

### 11 *Study size*

12  
13  
14 The study size is not derived statistically, as it consists of the total population of patients  
15 discharged from the five Heart Centres in the project period. The five Heart Centres  
16 diagnose and treat about 45,000 patients per year. These patients are diagnosed with  
17 numerous diseases and conditions and the aim is to describe differences, not only among  
18 the most common diagnoses but also the infrequent ones. Thus, all patients discharged  
19 from national Heart Centres over one year are included in order to secure as high a level  
20 of specificity as possible. Furthermore, by including a large number of participants, a  
21 shorter follow-up time is needed. Besides the primary objectives, further ancillary and spin-  
22 off analyses will be prepared. Clearly, power calculations cannot be performed  
23 prospectively for all potential analyses based on data from the DenHeart study. Moreover,  
24 adverse outcomes have very different incidence rates.

### 35 *Response rate*

36  
37 The final response rate is calculated based on discharge data from the National Patient  
38 Register. For calculating the actual number of eligible patients, the following are not  
39 included: patients without a Danish civil registration number, patients living in Greenland  
40 (no register follow-up possible), patients with two admissions within 24 hours, patients  
41 deceased in hospital and outpatient visits. Patients admitted for less than 24 hours without  
42 a procedure and readmitted with a procedure within one month are counted once.

43  
44  
45  
46  
47  
48  
49 [Even though patients are encouraged to fill out the questionnaire within 3 days all](#)  
50 [questionnaires completed within 4 weeks of discharge are included in the analyses.](#)  
51  
52  
53  
54

1  
2  
3  
4  
5  
6  
7  
8 Patients who have filled out more than one questionnaire during the project period due to  
9 repeated hospitalizations will only be counted once (the first questionnaire returned) in the  
10 final count of the response rate. The repeated measurements may be included in sub-  
11 analyses.  
12  
13  
14

#### 15 16 *Statistical methods*

17  
18 Objective 1: For each diagnostic group, age (mean), sex distribution and patient reported  
19 outcomes at hospital discharge distribution will be reported. Differences between groups  
20 will be tested by use of ANOVA tests for continuous variables and chi-squared tests for  
21 categorical variables. Multivariate logistic regression will be used to investigate the  
22 relationship between diagnostic group and patient reported outcomes when controlling for  
23 response date (number of days since hospital discharge), age, sex and other possible  
24 confounders, and in-hospital predicting factors (e.g. procedure, duration of index hospital  
25 admission, acute/elective admission, stay at intensive care unit, complications).  
26  
27  
28  
29  
30  
31  
32

33  
34 Objective 2a: For each diagnostic group, the crude associations between patient reported  
35 outcome measures at hospital discharge and all-cause and cardiac morbidity and all-  
36 cause and cardiac mortality after one year, will be described and assessed using ANOVA  
37 tests for continuous variables and chi-squared tests for categorical variables. In addition,  
38 multivariate Cox proportional hazards regression models, with age as the time scale, will  
39 be used to examine the associations between patient reported outcome measures at  
40 baseline and all-cause morbidity and mortality and cardiac morbidity and mortality when  
41 adjusting for response date, sex, co-morbidity and other potential confounding factors at  
42 baseline.  
43  
44  
45  
46  
47  
48  
49  
50  
51  
52  
53  
54  
55  
56  
57  
58  
59  
60

1  
2  
3  
4  
5  
6  
7  
8 Objective 2b: For each diagnostic group, the crude associations between patient reported  
9 outcome measures at hospital discharge and labour market affiliation (employment status,  
10 sick leave, early retirement pension) after one year will be described and assessed using  
11 the ANOVA tests for continuous variables and chi-squared tests for categorical variables.  
12  
13 Multivariate Cox proportional hazards regression models, with age as the time scale, will  
14  
15 also be carried out to investigate the associations between patient reported outcome  
16  
17 measures at baseline and labour market affiliation when adjusting for potential  
18  
19 confounding factors (e.g. response date, sex, co-morbidity).  
20  
21  
22

23  
24 Objective 2c: For each diagnostic group, the crude associations between patient reported  
25  
26 outcomes measures at hospital discharge and health care utilization (hospitalizations,  
27  
28 contact with general practitioner, medical specialist, and physiotherapist) after one year,  
29  
30 will be described and assessed using the ANOVA tests for continuous variables and chi-  
31  
32 squared tests for categorical variables. Multivariate Cox proportional hazards regression  
33  
34 models, with age as the time scale, will be used to analyse the association between  
35  
36 patient reported outcome measures at baseline and health care utilization when adjusting  
37  
38 for potential confounding variables (e.g. response date, sex, co-morbidity).  
39

#### 40 *Weighting*

41 It is possible to link both respondents and non-respondents in the survey on an individual  
42  
43 level to different administrative registers. Thus, non-response weights will be computed  
44  
45 based on register information (e.g. sex and age) in order to reduce non-response bias.  
46  
47 Patients with a low probability of response will be given a higher weight in the analyses to  
48  
49 represent the larger number of non-respondents with similar characteristics. Accordingly,  
50  
51 patients more likely to respond will be given a lower weight.  
52  
53  
54  
55  
56  
57  
58  
59  
60

### *Spin-off projects*

Several spin-off analyses will be prepared, ~~and conducted, e.g. a three year follow up analysis on the primary outcomes, the association between patient reported outcomes at discharge and cardiac events over time, patient reported outcomes and medication compliance and patient reported outcomes as a screening tool in clinical practice. A follow up survey after two to five years is being considered.~~

### **Ethics and dissemination**

The study is conducted in accordance with the Declaration of Helsinki. According to Danish legislation, surveys should not be approved by an ethics committee system but only by the Danish Data Protection Agency, no. 2007-58-0015/30-0937. The DenHeart survey is approved by the Institutional Boards of the Heart Centres and registered at ClinicalTrials.gov (NCT01926145). [Patients sign informed consent stating that participation is voluntary and that further information from patient records may be obtained.](#)

The National Institute of Public Health stores data from the DenHeart survey. Access to data can only be provided to investigators after approval from the Publication Committee.

All study results will be published in ~~international~~[international](#) research journals and conference presentations.

### **Discussion**

#### *Study population*

The five Heart Centres treat the most critically ill cardiac patients in Denmark. Approximately 47 regional or local hospitals treat cardiac patients medically and care for terminally ill cardiac patients. These patients are underrepresented in the DenHeart study.

1  
2  
3  
4  
5  
6  
7  
8 The patients in this study represent the patients with diagnoses where medical, invasive or  
9 surgical treatment is possible, and patients with rare conditions such as heart transplant  
10 and congenital heart disease. Furthermore, four of the five Heart Centres have a local  
11 hospital function treating all cardiac diagnoses. One surgical unit did not wish to participate  
12 in the study.  
13  
14  
15  
16

17  
18 Patients who are hospitalised several times in the project period will be asked to fill out the  
19 questionnaire each time. Repeated measures will only be used in sub-analyses. For  
20 reporting of primary outcomes, patients will only be counted once (the first questionnaire  
21 returned).  
22  
23  
24

#### 25 26 *Variables* 27

28  
29 The majority of the outcome measures included in the questionnaire is comprised of  
30 validated and standardised instruments to assess patient reported outcomes, which  
31 enhances the validity of the questionnaire. However, in the interpretation of the results, it  
32 must be taken into account that patients with different cardiac conditions differ regarding  
33 how much their health status has changed prior to admission to hospital, and that some of  
34 the instruments have long recall.  
35  
36  
37  
38  
39  
40

#### 41 *Confounding factors* 42

43  
44 From previous national health surveys, we know that age and socioeconomic position play  
45 a significant role for non-response. Also, regional differences of about 15 % in response  
46 rates have been documented.<sup>29, 30</sup> The patients treated at the Heart Centres are often aged  
47 and severely ill, which may be reflected in the response rates. This will be accounted for  
48 by reporting both actual responses as well as weighted data for the underrepresented  
49 groups in the analyses. However, several different initiatives are being conducted by the  
50  
51  
52  
53  
54

1  
2  
3  
4  
5  
6  
7  
8 centres to optimize response rates. Nurses are reminded to hand out the questionnaires at  
9 local meetings, by posters in the ward and logo-pens, and response rates are continuously  
10 shared with the ward nurses in order to secure motivation among the approximately 800  
11 nurses involved in the distribution of questionnaires. Letters are sent to the local hospitals  
12 that receive patients from the Heart Centres asking to remind the patients to fill out the  
13 questionnaire at discharge to home. Some centres are mailing questionnaires to patients  
14 after discharge when they are not handed out in hospital. [Mailed questionnaires are sent](#)  
15 [with overnight post service allowing the questionnaire to be filled out within the 3 days.](#) As  
16 this is a national multicentre study, regional differences in ways to enhance the response  
17 rates may occur. All of these different strategies fall within the frame of the DenHeart study  
18 and timeframe for responding.  
19  
20  
21  
22  
23  
24  
25  
26  
27  
28

### 29 **Contributorship**

30 SKB conceived the study. SKB, AVC, MH, LT, BB, JS, AM, AL, AIC, KJ and OE initiated  
31 the study design and implementation. KJ, AIC and OE provided statistical expertise in the  
32 clinical trial design. All contributed to the refinement of the study protocol.  
33  
34  
35  
36  
37  
38

### 39 **Funding**

40 This work was supported by the five participating Heart Centres in Denmark. Further  
41 funding will be applied for from external funds.  
42  
43  
44  
45

### 46 **Competing interest**

47 No competing interests have been declared by the authors.  
48  
49  
50  
51  
52  
53  
54  
55  
56  
57  
58  
59  
60



1  
2  
3  
4  
5  
6  
7  
8 **References**  
9

- 10  
11 1. Rumsfeld JS, Alexander KP, Goff DC, Jr, Graham MM, Ho PM, Masoudi FA, et al.  
12 **Cardiovascular health: the importance of measuring patient-reported health status:**  
13 **a scientific statement from the American Heart Association. *Circulation* 2013; Jun**  
14 **4;127(22):2233-49.**  
15  
16  
17  
18  
19 2. Pressler SJ, Kim J, Riley P, Ronis DL, Gradus-Pizlo I. Memory dysfunction,  
20 psychomotor slowing, and decreased executive function predict mortality in  
21 patients with heart failure and low ejection fraction. *J Card Fail* 2010; Sep;16(9):750-  
22 60.  
23  
24  
25  
26  
27 3. Hoekstra T, Jaarsma T, van Veldhuisen DJ, Hillege HL, Sanderman R, Lesman-  
28 Leegte I. Quality of life and survival in patients with heart failure. *Eur J Heart Fail*  
29 2012; Sep 18;.  
30  
31  
32  
33 4. Soto GE, Jones P, Weintraub WS, Krumholz HM, Spertus JA. Prognostic value of  
34 health status in patients with heart failure after acute myocardial infarction.  
35 *Circulation* 2004; Aug 3;110(5):546-51.  
36  
37  
38  
39 5. Heidenreich PA, Spertus JA, Jones PG, Weintraub WS, Rumsfeld JS, Rathore SS,  
40 et al. Health status identifies heart failure outpatients at risk for hospitalization or  
41 death. *J Am Coll Cardiol* 2006; Feb 21;47(4):752-6.  
42  
43  
44  
45  
46 6. Biering K, Nielsen TT, Rasmussen K, Niemann T, Hjollund NH. Return to work  
47 after percutaneous coronary intervention: the predictive value of self-reported  
48 health compared to clinical measures. *PLoS One* 2012;7(11):e49268.  
49  
50  
51  
52  
53  
54

- 1  
2  
3  
4  
5  
6  
7  
8 7. Szekely A, Nussmeier NA, Miao Y, Huang K, Levin J, Feierfeil H, et al. A  
9 multinational study of the influence of health-related quality of life on in-hospital  
10 outcome after coronary artery bypass graft surgery. *Am Heart J* 2011;  
11 Jun;161(6):1179,1185.e2.  
12  
13  
14  
15  
16 8. Steinberg JS, Joshi S, Schron EB, Powell J, Hallstrom A, McBurnie M, et al.  
17 Psychosocial status predicts mortality in patients with life-threatening ventricular  
18 arrhythmias. *Heart Rhythm* 2008; Mar;5(3):361-5.  
19  
20  
21  
22  
23 9. Spertus JA, Jones P, McDonell M, Fan V, Fihn SD. Health status predicts long-  
24 term outcome in outpatients with coronary disease. *Circulation* 2002; Jul  
25 2;106(1):43-9.  
26  
27  
28  
29  
30 10. Ware J, Jr, Kosinski M, Keller SD. A 12-Item Short-Form Health Survey:  
31 construction of scales and preliminary tests of reliability and validity. *Med Care*  
32 1996; Mar;34(3):220-33.  
33  
34  
35  
36 11. De Smedt D, Clays E, Doyle F, Kotseva K, Prugger C, Pajak A, et al. Validity and  
37 reliability of three commonly used quality of life measures in a large European  
38 population of coronary heart disease patients. *Int J Cardiol* 2013; Sep 1;167(5):2294-  
39 9.  
40  
41  
42  
43  
44 12. Zigmond AS, Snaith RP. The hospital anxiety and depression scale. *Acta*  
45 *Psychiatr Scand* 1983; Jun;67(6):361-70.  
46  
47  
48  
49  
50  
51  
52  
53  
54  
55  
56  
57  
58  
59  
60

- 1  
2  
3  
4  
5  
6  
7  
8 13. Bjelland I, Dahl AA, Haug TT, Neckelmann D. The validity of the Hospital Anxiety  
9 and Depression Scale. An updated literature review. *J Psychosom Res* 2002;  
10 Feb;52(2):69-77.  
11  
12  
13  
14 14. Snaith RP. The Hospital Anxiety And Depression Scale. *Health Qual Life*  
15 *Outcomes* 2003; Aug 1;1:29.  
16  
17  
18  
19 15. Rabin R, de Charro F. EQ-5D: a measure of health status from the EuroQol  
20 Group. *Ann Med* 2001; Jul;33(5):337-43.  
21  
22  
23  
24 16. Broadbent E, Petrie KJ, Main J, Weinman J. The brief illness perception  
25 questionnaire. *J Psychosom Res* 2006; Jun;60(6):631-7.  
26  
27  
28  
29 17. Oldridge N, Hofer S, McGee H, Conroy R, Doyle F, Saner H. The HeartQoL: Part I.  
30 Development of a new core health-related quality of life questionnaire for patients  
31 with ischemic heart disease. *Eur J Prev Cardiol* 2012; Jul 20;.  
32  
33  
34  
35 18. Oldridge N, Hofer S, McGee H, Conroy R, Doyle F, Saner H. The HeartQoL: Part II.  
36 Validation of a new core health-related quality of life questionnaire for patients with  
37 ischemic heart disease. *Eur J Prev Cardiol* 2012; Jul 20;.  
38  
39  
40  
41  
42 19. Oldridge N, Saner H, McGee HM, HeartQoL Study Investigators. The Euro Cardio-  
43 QoL Project. An international study to develop a core heart disease health-related  
44 quality of life questionnaire, the HeartQoL. *Eur J Cardiovasc Prev Rehabil* 2005;  
45 Apr;12(2):87-94.  
46  
47  
48  
49  
50 20. Chang VT, Hwang SS, Feuerman M. Validation of the Edmonton Symptom  
51 Assessment Scale. *Cancer* 2000; May 1;88(9):2164-71.  
52  
53  
54  
55  
56  
57  
58  
59  
60

- 1  
2  
3  
4  
5  
6  
7  
8 21. Ezekowitz JA, Thai V, Hodnefield TS, Sanderson L, Cujec B. The correlation of  
9 standard heart failure assessment and palliative care questionnaires in a  
10 multidisciplinary heart failure clinic. *J Pain Symptom Manage* 2011; Sep;42(3):379-  
11 87.  
12  
13  
14  
15  
16 22. Thygesen LC, Daasnes C, Thaulow I, Bronnum-Hansen H. Introduction to Danish  
17 (nationwide) registers on health and social issues: structure, access, legislation,  
18 and archiving. *Scand J Public Health* 2011; Jul;39(7 Suppl):12-6.  
19  
20  
21  
22  
23 23. Pedersen CB. The Danish Civil Registration System. *Scand J Public Health* 2011;  
24 Jul;39(7 Suppl):22-5.  
25  
26  
27  
28 24. Lynge E, Sandegaard JL, Rebolj M. The Danish National Patient Register. *Scand*  
29 *J Public Health* 2011; Jul;39(7 Suppl):30-3.  
30  
31  
32  
33 25. Andersen JS, Olivarius Nde F, Krasnik A. The Danish National Health Service  
34 Register. *Scand J Public Health* 2011; Jul;39(7 Suppl):34-7.  
35  
36  
37  
38 26. Petersson F, Baadsgaard M, Thygesen LC. Danish registers on personal labour  
39 market affiliation. *Scand J Public Health* 2011; Jul;39(7 Suppl):95-8.  
40  
41  
42  
43 27. Jensen VM, Rasmussen AW. Danish Education Registers. *Scand J Public Health*  
44 2011; Jul;39(7 Suppl):91-4.  
45  
46  
47  
48 28. Baadsgaard M, Quitzau J. Danish registers on personal income and transfer  
49 payments. *Scand J Public Health* 2011; Jul;39(7 Suppl):103-5.  
50  
51  
52  
53  
54  
55  
56  
57  
58  
59  
60

1  
2  
3  
4  
5  
6  
7  
8  
9  
10  
11  
12  
13  
14  
15  
16  
17  
18  
19  
20  
21  
22  
23  
24  
25  
26  
27  
28  
29  
30  
31  
32  
33  
34  
35  
36  
37  
38  
39  
40  
41  
42  
43  
44  
45  
46  
47  
48  
49  
50  
51  
52  
53  
54  
55  
56  
57  
58  
59  
60

29. Christensen AI, Ekholm O, Glumer C, Andreasen AH, Hvidberg MF, Kristensen PL, et al. The Danish National Health Survey 2010. Study design and respondent characteristics. *Scand J Public Health* 2012; Jun;40(4):391-7.

30. Ekholm O, Gundgaard J, Rasmussen NK, Hansen EH. The effect of health, socio-economic position, and mode of data collection on non-response in health interview surveys. *Scand J Public Health* 2010; Nov;38(7):699-706.
